1                                   **A hippocampal-hypothalamic circuit essential for**  
2                                   **anxiety-related behavioral avoidance**

3  
4   Jing-Jing Yan<sup>1,2</sup>, Ai-Xiao Chen<sup>1,2,7</sup>, Wen Zhang<sup>1,2,7</sup>, Ting He<sup>5,6,7</sup>, Xiao-Jing Ding<sup>1,2,7</sup>, Zi-Xian  
5   Yu<sup>1,2,3,7</sup>, Yan-Li Zhang<sup>1,2</sup>, Mengge He<sup>5,6</sup>, Haohong Li<sup>4</sup>, Xiao-Hong Xu<sup>1,2,8\*</sup>

6  
7   **Affiliations:**

8   <sup>1</sup> *Institute of Neuroscience, State Key Laboratory of Neuroscience, CAS Center for Excellence*  
9   *in Brain Science and Intelligence Technology, Chinese Academy of Sciences, Shanghai*  
10   *200031, China*

11   <sup>2</sup> *Shanghai Center for Brain Science and Brain-Inspired Intelligence Technology, Shanghai*  
12   *200031, China*

13   <sup>3</sup> *University of Chinese Academy of Sciences, Beijing 100049, China*

14   <sup>4</sup> *The MOE Frontier Research Center of Brain & Brain machine Integration, Zhejiang*  
15   *University School of Brain Science and Brain Medicine, Hangzhou Zhejiang 310058, China*

16   <sup>5</sup> *Britton Chance Center for Biomedical Photonics, Wuhan National Laboratory for*  
17   *Optoelectronics, Huazhong University of Science and Technology, Wuhan, Hubei 430074,*  
18   *China*

19   <sup>6</sup> *MoE Key Laboratory for Biomedical Photonics, Collaborative Innovation Center for*  
20   *Biomedical Engineering, School of Engineering Sciences, Huazhong University of Science*  
21   *and Technology, Wuhan, Hubei 430074, China*

22   <sup>7</sup> *Denotes equal contribution*

23   <sup>8</sup> *Lead contact*

24   \*, Corresponding author: Xiao-Hong Xu. E-mail: [xiaohong.xu@ion.ac.cn](mailto:xiaohong.xu@ion.ac.cn)

## 25 **Abstract**

26 Anxiety over perceived threats triggers avoidance behavior, but the underlying neural circuit  
27 mechanism remains poorly understood. Taking hints from the deep connection between anxiety  
28 and predator defense, we examined the role of the anterior hypothalamic nucleus (AHN), a  
29 critical node in the predator defense network, in anxiety-related behaviors. By recording  $\text{Ca}^{2+}$   
30 transients in behaving mice, we found that activity of AHN GABAergic ( $\text{AHN}^{\text{Vgat}^+}$ ) neurons  
31 showed individually stable increases when animals approached unfamiliar objects in an open  
32 field (OF) or explored the open arm of an elevated plus-maze (EPM). Moreover,  $\text{AHN}^{\text{Vgat}^+}$   
33 neuron activity foreshadowed behavioral retreats and correlated with object and open-arm  
34 avoidance. Crucially, exploration-triggered optogenetic inhibition of  $\text{AHN}^{\text{Vgat}^+}$  neurons  
35 dramatically reduced avoidance behaviors. Furthermore, retrograde viral tracing identified the  
36 ventral subiculum (vSub) of the hippocampal formation as a significant input to  $\text{AHN}^{\text{Vgat}^+}$   
37 neurons in driving avoidance behaviors. Thus, the activity of the hippocampal-hypothalamic  
38 pathway promotes idiosyncratic anxiety-related behavioral avoidance.

39

## 40 **Introduction**

41 Anxiety represents an emotional state of apprehension about remote, potential,  
42 unpredictable, or ill-defined threats <sup>1-4</sup>. It keeps individuals vigilant about potential harms,  
43 thereby preparing them for safety measures <sup>4,5</sup>. Using behavioral tests that exploit the  
44 “approach-avoidance” conflict <sup>6</sup>, such as the open field test and the elevated plus-maze (EPM),  
45 previous studies have identified many brain areas that work in concert to regulate approach-  
46 avoidance behaviors <sup>7-10</sup>. Some of these brain regions, such as ventral CA1 (vCA1) of the  
47 hippocampus, the lateral septum nuclei (LS), and the bed nucleus of the stria terminalis (BNST),  
48 modulate approach-avoidance behaviors in part through projections to hypothalamic nuclei <sup>11-</sup>  
49 <sup>13</sup>. Intriguingly, brief predator encounters increase anxiety levels in species ranging from

50 flatworms to fish, rodents, and primates <sup>14-17</sup>, pointing to an evolutionarily conserved  
51 mechanism linking predator-provoked defensive behavior with anxiety <sup>18-21</sup>. Conversely,  
52 animals selectively bred for high anxiety traits show increased defensive avoidance to predator  
53 cues <sup>22</sup>. Moreover, anti-anxiety drug treatments diminish predator defense in normal animals  
54 <sup>23,24</sup>. Together, these findings suggest that neural substrates underlying anxiety-related  
55 behaviors overlap with those mediating predator defense behavior.

56

57 The present study focused on the anterior hypothalamic nucleus (AHN), which  
58 reciprocally connects with the ventromedial hypothalamus (VMH) and the dorsal  
59 premammillary nucleus of the hypothalamus (PMd) to form the hypothalamus predator defense  
60 network <sup>25,26</sup>. Predator cues activate this network, particularly VMH <sup>26-30</sup>. Optogenetic  
61 activation of VMH neurons or their projections to AHN is sufficient to drive avoidance  
62 behaviors such as flight <sup>31</sup>. However, lesioning the AHN failed to produce an effect on predator  
63 defense as clear as that of VMH or PMd <sup>27,28,32,33</sup>. By comparison, anti-anxiety drug treatment  
64 reduces predator-induced c-Fos signals in AHN but not VMH <sup>24</sup>. Additionally, LS neurons that  
65 express type 2 corticotropin-releasing factor receptor (Crfr2) enhance stress-induced anxiety  
66 behaviors and cortisol release through projections to AHN <sup>12</sup>. Based on these results, we  
67 focused on AHN neurons as a potential convergence site for neural circuits linking anxiety with  
68 threat-evoked avoidance behaviors.

69

70 We first found that activity of AHN GABAergic neurons (AHN<sup>Vgat+</sup>) strongly correlated  
71 with the mouse avoidance behaviors in two standard anxiety tests, with each mouse exhibiting  
72 consistent and individual-specific AHN<sup>Vgat+</sup> activity changes. Furthermore, we showed that  
73 optogenetic inhibition of AHN<sup>Vgat+</sup> neurons at the time of exploration reduced subsequent  
74 avoidance behaviors. Using pseudorabies virus retrograde tracing, we further identified the

75 ventral subiculum (vSub) of the hippocampal formation as a major input to  $AHN^{Vgat+}$  neurons  
76 in driving avoidance behaviors. These results point to the importance of the hippocampal-  
77 hypothalamic circuit in controlling anxiety-related behavioral avoidance.

78

## 79 **Results**

### 80 ***Strong temporal correlation of $AHN^{Vgat+}$ neuron activity with anxiety-related avoidance*** 81 ***behavior in a modified open field paradigm***

82 Center avoidance and peripheral preference in an open field test are behavioral parameters  
83 that indicate rodent anxiety levels<sup>6</sup>. By introducing an unfamiliar object (a battery) to the center  
84 of an open field ~10 mins after a mouse freely explored the arena, we found that this procedure  
85 led to more substantial center avoidance and peripheral preference (**Fig. 1a**), indicating that an  
86 unfamiliar object elevates the anxiety level. Such behavioral changes were not observed in  
87 control animals that were allowed to explore the open field continuously for 20 mins, with the  
88 experimenter's hand interruption briefly without placing the object (**Fig. 1b**). Thus, object-  
89 evoked behavioral changes were unlikely caused by fatigue, habituation, or human interference.

90

91 Because behavioral changes elicited by an unfamiliar object in the open field test are  
92 similar to those caused by brief predator exposure (Kennedy et al., 2020), we further inquired  
93 whether the hypothalamus predator defense circuit, particularly AHN, was engaged during the  
94 process (**Fig. 1c**). First, our *in situ* mapping of mRNAs of vesicular transporters for GABA and  
95 glutamate (*Vgat* and *Vglut2*) showed that, among all *Vgat+* and *Vglut2+* neurons in AHN, the  
96 vast majority ( $83.0 \pm 5.7\%$ ,  $n = 3$  mice) expressed *Vgat* (**Fig. 1d**). We thus used the *Vgat-IRES-*  
97 *Cre* line to target AHN *Vgat+* ( $AHN^{Vgat+}$ ) neurons. We independently validated the fidelity of  
98 this mouse line by injecting adeno-associated virus (AAVs) encoding Cre-inducible EYFP into  
99 AHN, in which we found  $98.9 \pm 0.7\%$  of GFP+ neurons expressed *Vgat* (Extended Data Fig.

100 1a, n = 3 mice).

101

102 To monitor the activity of AHN<sup>Vgat+</sup> neurons, we injected AAVs encoding Cre-inducible  
103 GCaMP6s, or EYFP as the control, into AHN of *Vgat-IRES-Cre* mice and implanted an optic  
104 fiber above the injection site (**Fig. 1e**). These procedures did not result in apparent changes in  
105 object-evoked avoidance behavior in the open field (before vs. after object introduction,  
106 peripheral zone time,  $385.8 \pm 10.8$  s vs.  $500.7 \pm 16.3$  s,  $p < 1 \times 10^{-4}$ , n = 22 mice). Before  
107 object introduction, GCaMP6s signals of AHN<sup>Vgat+</sup> neurons were not significantly modulated  
108 by the location of the animal in the open field (**Fig. 1f**). Remarkably, after object introduction,  
109 GCaMP6s signals of AHN<sup>Vgat+</sup> neurons elevated considerably, with the most dramatic increase  
110 observed when the mouse arrived at the open field center zone (**Fig. 1f**). Notably, such  
111 fluorescent signal changes were not observed in control animals that expressed EYFP in  
112 AHN<sup>Vgat+</sup> neurons (Extended Data Fig. 1b-d), indicating that changes in GCaMP6s signals  
113 were unlikely caused by motion artifacts.

114

115 Moreover, we found that AHN<sup>Vgat+</sup> GCaMP6s signals tracked with the animal's distance  
116 relative to the object (**Fig. 1g**), ramping up as the animal approached the object and down as it  
117 retreated to the peripheral zone (**Fig. 1h-i**). For individual trials, the overall temporal dynamics  
118 of AHN<sup>Vgat+</sup> fluorescence signals strongly correlated with “approach-retreat” bouts in  
119 GCaMP6s mice with an average correlation coefficient (r) of  $0.28 \pm 0.05$  (n = 14 mice),  
120 significantly higher than that of EYFP control mice ( $r = -0.03 \pm 0.01$ , n = 8 mice;  $p < 1 \times 10^{-4}$ ).  
121 Furthermore, the peak value of AHN<sup>Vgat+</sup> GCaMP6s signals at the end of a center approach, a  
122 turning point before the retreat, positively correlated with the latency to initiate the next  
123 approach (**Fig. 1j**,  $r = 0.28$ ,  $p < 1 \times 10^{-4}$ ), suggesting that close encounter with the object elevated  
124 the anxiety. Along the same line, the average “turning point” AHN<sup>Vgat+</sup> GCaMP6s signals in a

125 trial significantly correlated with the total duration that the animal spent in the peripheral zone  
126 away from the object (**Fig. 1k**,  $r^2 = 0.28$ ,  $p = 0.0055$ ).

127

128 As a comparison study, we placed an object in the mouse's home cage for three days for  
129 familiarization and then performed the open field test with the familiarized object in the center  
130 (Extended Data Fig. 2a). Interestingly, despite intense object investigation,  $AHN^{Vgat+}$   
131 GCaMP6s signals did not change during approach or retreat (Extended Data Fig. 2b-d). No  
132 signal was observed when the mouse investigated, sniffed, or mounted a female mouse  
133 introduced to its homecage either (Extended Data Fig. 2e-h). Thus,  $AHN^{Vgat+}$  neuron activity  
134 does not reflect exploratory actions or social activity. Together, these results show a robust  
135 temporal correlation between  $AHN^{Vgat+}$  neuron activity and anxiety-related avoidance behavior.

136

137 ***Object-evoked AHN activity shows individual specificity and converges with predator cue***  
138 ***response***

139 To investigate whether any specific features of the object used (a battery) is responsible  
140 for evoking  $AHN^{Vgat+}$  activity, we performed a new set of experiments using three other  
141 alternative items, an acrylic cuboid cube, a toy airplane, and a metal paper clip, in addition to  
142 the battery, as the unfamiliar object (Extended Data Fig. 3a). We individually presented these  
143 four objects on separate testing days in a pseudo-randomized order (Extended Data Fig. 3b).  
144 We found that all objects drove the tested animals to spend more time in the peripheral zone  
145 after being introduced to the open field (Extended Data Fig. 3c). Furthermore, we found a  
146 similar temporal correlation of ramping  $AHN^{Vgat+}$  GCaMP6s signals with approach-retreat bout  
147 and with the time spent in the peripheral zone for all four objects (**Fig. 2a-b**). Notably, the  
148  $AHN^{Vgat+}$  GCaMP6s signals and avoidance behavior evoked by the unfamiliar object were  
149 variable among different mice, yet the same mouse showed highly consistent responses towards

150 different objects. Further pair-wise analysis showed a strong correlation of data between  
151 individual trials of two different objects, for the average turning point GCaMP6s signals and  
152 the time spent in the peripheral zone (**Fig. 2c**). This individual specificity further supports the  
153 notion that elevated AHN<sup>Vgat+</sup> neuron activity underlies anxiety-related avoidance behavior.

154

155 To examine whether object-activated AHN neurons converge with those responding to  
156 predator cues, we performed single-unit recordings in AHN while sequentially exposing the  
157 mouse to an unfamiliar object in an open field and a piece of paper spotted with fox urine in a  
158 clean cage (Extended Data Fig. 4, **Fig. 2d-f**). 9 out of the 63 single units recorded from three  
159 mice increased firing during object approach, and 5 increased during fox urine sniff (**Fig. 2e**).  
160 Moreover, 3 of these units responded to both object and fox urine (**Fig. 2d, e**). Thus, object and  
161 predator cues activated partially overlapping AHN neuronal ensemble. These results further  
162 support elevated AHN neuron activity as a neural mechanism linking anxiety with hardwired  
163 avoidance behaviors evolutionarily selected for predator defense.

164

### 165 ***Inhibiting object-evoked AHN<sup>Vgat+</sup> activity reduces avoidance***

166 We next examined whether inhibiting AHN<sup>Vgat+</sup> neuron activity evoked by an unfamiliar  
167 object could abolish object-induced increases in anxiety and avoidance behavior. To this end,  
168 we bilaterally injected AAVs encoding Cre-inducible GtACR1, or EYFP as the control, into  
169 AHN of *Vgat-IRES-Cre* male mice (**Fig. 3a**) and implanted an optic fiber 300-500  $\mu\text{m}$  above  
170 each injection site (**Fig. 3b**). We used *ex vivo* patch-clamp recordings to confirm that pulses of  
171 blue light (473nm, 20ms, 20Hz) effectively and reversibly silenced GtACR1-expressing  
172 AHN<sup>Vgat+</sup> neurons (**Fig. 3c-d**). By analyzing fiber-photometry recorded animals (**Fig. 1**), we  
173 found that the starting point for approach bouts toward the object was mostly located within  
174 the peripheral zone (**Fig. 3e**). Therefore, we delivered light pulses whenever the mouse left the

175 peripheral zone after object introduction to inhibit object-evoked  $AHN^{Vgat+}$  neuron activity  
176 during the approach (**Fig. 3e**). These light pulses had no effect in control EYFP mice but  
177 completely abolished the object avoidance and peripheral preference in GtACR1 mice (**Fig.**  
178 **3f-g**). Thus, the elevated activity of  $AHN^{Vgat+}$  neurons during the approach could reflect the  
179 increased anxiety level caused by the object.

180

181 Because the activity of  $AHN^{Vgat+}$  neurons climaxed before the retreat, we further inhibited  
182 these neurons with more precise temporal control by applying the light pulses when mice  
183 arrived at the center zone where the unfamiliar object was placed, and most retreat bouts were  
184 initiated (**Fig. 3h**). For this set of experiments, we recorded baseline behavior for 10 min before  
185 and after the introduction of an object (a battery or a cuboid) to the center (**Fig. 3i**), and the  
186 light was then delivered whenever the mouse arrived at the center zone during the next 10 mins  
187 (**Fig. 3i**). Remarkably, optogenetic inhibition of  $AHN^{Vgat+}$  neurons in the center zone drastically  
188 reduced the object avoidance, as shown by more time spent in the center zone and less time in  
189 the peripheral zone during the inhibition phase as compared to that during the baseline period  
190 (**Fig. 3i-j**, Extended Data Fig. 5a-b). This behavioral effect even persisted after the cessation  
191 of the light (**Fig. 3i-j**, Extended Data Fig. 5a-b).

192

193 In the above experiments, the extended duration the mice spent in the presence of the  
194 object (30 min) by itself did not reduce object avoidance since EYFP control mice showed no  
195 reduction of object avoidance before and after light stimulation (**Fig. 3j**, Extended Data Fig.  
196 4a-b). Furthermore, the behavioral effects of optogenetic inhibition in GtACR1 animals were  
197 unlikely due to a light-conditioned place preference (CPP). When we paired light delivery to  
198 one of the two chambers in a CPP apparatus (Extended Data Fig. 5c), light did not lead to  
199 preference of the paired chamber in either EYFP or GtACR1 animals (Extended Data Fig. 5d).



200 Together, these results support that elevated  $AHN^{Vgat+}$  neuron activity underlies object-induced  
201 anxiety and avoidance behavior.

202

### 203 *Progressive engagement of $AHN^{Vgat+}$ neurons during the elevated plus-maze test*

204 To examine whether  $AHN^{Vgat+}$  neurons regulate anxiety-related behaviors in another  
205 scenario, we monitored the activity of  $AHN^{Vgat+}$  neurons in mice exploring an elevated plus-  
206 maze (EPM), where avoidance of the open arm indicates general anxiety levels of the mice. In  
207 general, we found that the mouse exhibited significantly higher  $AHN^{Vgat+}$  neuron activity in the  
208 open arm than the closed arm, as shown by the heat map of recorded activity from an example  
209 mouse (**Fig. 4a**). For all mice recorded, the average GCaMP6s signal ( $\Delta F/F$ ) in the open arm  
210 ( $2.7 \pm 0.8\%$ ) was significantly higher than that found in the closed arm ( $-0.5 \pm 0.1\%$ ,  $n = 14$   
211 mice,  $p = 0.0028$ ). No difference of signals was found in EYFP control mice (open arm  $0.4 \pm$   
212  $0.4\%$ , closed arm,  $-0.1 \pm 0.1\%$ ,  $n = 8$  mice,  $p = 0.74$ ).

213

214 Mice exhibit progressive higher anxiety during repeated exposure to EPM<sup>34</sup>. This was  
215 supported by our observation of a marked reduction in open arm exploration in the second trial  
216 compared to the first trial (**Fig. 4b**). Notably, we found significantly higher  $AHN^{Vgat+}$  activity  
217 in the open arm during the second trial than during the first trial (**Fig. 4c**). A progressive  
218 increase in  $AHN^{Vgat+}$  activity could be discerned even within the first trial, as shown by higher  
219 activity during the second 5 min than during the first 5 min of the trial (**Fig. 4d**). Correlation  
220 analysis showed that for all trials, the average open-arm GCaMP6s signals positively correlated  
221 with the total time that the mouse spent in the closed arm (**Fig. 4e**). Furthermore, we found that  
222 the  $AHN^{Vgat+}$  activity in the open arm of EPM significantly correlated with object-evoked  
223  $AHN^{Vgat+}$  activity at the open field center ( $r^2 = 0.30$ ,  $p < 0.044$ ), suggesting that the elevation  
224 of  $AHN^{Vgat+}$  neuron activity may play a similar role in these two different anxiogenic situations.

225 To further determine whether the activity of  $AHN^{Vgat+}$  neurons is critical for EPM open  
226 arm avoidance, we optogenetically inhibited these neurons by virally expressing GtACR1 in  
227  $AHN^{Vgat+}$  neurons and applied blue light via implanted optic fibers. The light was applied to  
228 only one of the two open arms (**Fig. 4f**). We found that GtACR1 mice spent significantly more  
229 time exploring the light-illuminated open arm, while EYFP control mice spent a comparable  
230 amount of time in either open arm (**Fig. 4f-g**). Interestingly, this behavioral effect was more  
231 substantial during the second 5 min than the first 5 min of the trial, consistent with the  
232 progressive increase of  $AHN^{Vgat+}$  neuron activity described above (**Fig. 4h**). Furthermore, we  
233 found a similar increase in open arm exploration in a new set of experiments when we shined  
234 the light to both open arms to inhibit  $AHN^{Vgat+}$  neurons (Extended Data Fig. 6). Together, these  
235 results indicate that  $AHN^{Vgat+}$  neuron activity is essential for EPM open arm avoidance.

236

### 237 *Hippocampal formation sends monosynaptic excitatory inputs to $AHN^{Vgat+}$ neurons*

238 We next sought to identify the synaptic inputs that drive  $AHN^{Vgat+}$  neuron activity and  
239 avoidance behavior in anxiety-provoking situations, using a pseudorabies virus tracing strategy  
240 <sup>35</sup>. A mixture of AAVs encoding Cre-inducible avian retroviral receptor (TVA)-GFP and rabies  
241 glycoprotein (RG) was unilaterally injected into AHN of *Vgat-IRE5-Cre* male mice, followed  
242 three weeks later with the injection of EnVA-coated pseudorabies virus expressing dsRed but  
243 lacking the glycoprotein into the same site (**Fig. 5a**). Our results showed many GFP+/dsRed+  
244 “starter” cells in AHN (**Fig. 5b**) and retrograde-labeled dsRed+ cells in many upstream brain  
245 regions (**Fig. 5c**, Extended Data Fig. 7a-b). For parallel controls, mice were injected with AAVs  
246 encoding Cre-inducible TVA but not RG (Extended Data Fig. 7c), a procedure preventing the  
247 spread of pseudorabies virus after infection of the “starter” cells. We found no dsRed+ cells in  
248 upstream brain regions of these control mice (Extended Data Fig. 7c-e), validating the  
249 retrograde viral tracing strategy. Quantification of labeled upstream neurons showed that

250 AHN<sup>Vgat+</sup> neurons received significant inputs from the lateral septum (LS), medial preoptic  
251 area (MPO), and bed nucleus of stria terminalis (BNST) (Extended Data Fig. 7b), all of them  
252 are known to harbor predominantly GABAergic neurons ([www.mouse.brain-map.org](http://www.mouse.brain-map.org)). On the  
253 other hand, among upstream regions likely to provide excitatory inputs to AHN<sup>Vgat+</sup> neurons,  
254 the ventral subiculum (vSub) of the hippocampal formation, which has been implicated in  
255 stress response, emotion regulation, and spatial navigation <sup>36</sup>, had the highest percentage of  
256 retrogradely labeled neurons (**Fig. 5d**).

257

258 To confirm the monosynaptic connectivity from vSub neurons to AHN<sup>Vgat+</sup> neurons, we  
259 injected AAVs encoding hSyn-ChR2-mCherry unilaterally into vSub and AAVs encoding Cre-  
260 inducible mCherry into AHN of *Vgat-IRES-Cre* mice to label AHN<sup>Vgat+</sup> neurons fluorescently.  
261 We then performed patch-clamp recording from AHN<sup>Vgat+</sup> neurons in acute brain slices  
262 containing AHN to monitor synaptic activity evoked by vSub projections (**Fig. 5e**). Of 35  
263 mCherry-expressing AHN<sup>Vgat+</sup> cells recorded from 6 mice, single light pulses (473 nm, 10 ms)  
264 evoked excitatory postsynaptic currents (EPSCs) in 11 cells (**Fig. 5f & g**), with a connection  
265 rate of 31%. The amplitude and latency for light-evoked EPSCs were  $21.9 \pm 7.8$  pA and  $5.5 \pm$   
266  $0.3$  ms, respectively. Furthermore, tetrodotoxin (TTX) blocked light-evoked postsynaptic  
267 currents, which was reversed by the addition of 4-aminopyridine (4-AP) (**Fig. 5g & h**).  
268 Together, these results show the existence of monosynaptic excitatory inputs from vSub to  
269 AHN<sup>Vgat+</sup> neurons.

270

271 To examine whether AHN-projecting vSub neurons are responsible for AHN<sup>Vgat+</sup>  
272 neuron activation during anxiogenic situations, we expressed GCaMP6s in vSub neurons  
273 projecting to AHN. This was achieved by injecting retroAAVs <sup>37</sup> encoding Cre-mCherry  
274 unilaterally into AHN of wildtype mice and AAVs encoding Cre-inducible GCaMP6s into vSub

275 on the ipsilateral side (**Fig. 5i**). By monitoring GCaMP6s signals, we found that AHN-  
276 projecting vSub neurons displayed characteristic ramping activity during the approach-retreat  
277 bout in response to an unfamiliar object in the open field that aligned similarly to that found in  
278 AHN<sup>Vgat+</sup> neurons (**Fig. 5j**). Furthermore, AHN-projecting vSub neurons showed higher and  
279 progressively increasing GCaMP6s signals in the open arm than the closed arm during the EPM  
280 test (**Fig. 5k-l**). Taken together, the close correspondence between the activity patterns of AHN-  
281 projecting vSub neurons and AHN<sup>Vgat+</sup> neurons supports that vSub inputs drive AHN<sup>Vgat+</sup>  
282 neurons in anxiety-provoking situations.

283

### 284 ***Inhibiting AHN-projecting vSub neurons diminishes anxiety-related avoidance behavior***

285 Finally, to test whether AHN-projecting vSub neurons acutely regulate anxiety-related  
286 avoidance behavior, we specifically inhibited these neurons by bilaterally injecting retroAAVs  
287 encoding Cre-mCherry into AHN and AAVs encoding Cre-inducible GtACR1 into vSub (**Fig.**  
288 **6a-b**). Through *ex vivo* patch-clamp recordings, we confirmed that blue light pulses effectively  
289 and reversibly silenced GtACR1-expressing vSub neurons (**Fig. 6c-d**). By inhibiting the  
290 activity of AHN-projecting vSub neurons during the mouse's approach towards the unfamiliar  
291 object in the open field (**Fig. 6e**), we completely abolished object-induced avoidance behavior  
292 in GtACR1 animals (**Fig. 6f-h**). Similarly, light inhibition of AHN-projecting vSub neurons  
293 also significantly increased the total time that the mouse spent in the light-illuminated open  
294 arm (**Fig. 6i-j**). This inhibition of open arm avoidance was also more evident in the second 5  
295 min than the first 5 min of the trial (**Fig. 6k**). Together, these experiments establish that the  
296 activity of AHN-projecting vSub neurons is required for anxiety-related avoidance behavior.

297

### 298 **Discussion**

299 This study delineated a vSub to AHN pathway essential for anxiety-related avoidance

300 behavior in two different conditions. As AHN is generally thought to be a node of the “predator  
301 defense circuit”, this vSub to AHN pathway provides a potential circuit mechanism to explain  
302 the well-known interaction between anxiety and predator defense behaviors. Moreover, the  
303 vSub-to-AHN circuit may channel mental assessment of potential threats by the hippocampus  
304 and other cognitive brain areas to initiate motor programs for avoidance. Such a pathway would  
305 allow for flexible, context-dependent, and individually varied displays of anxiety-related  
306 avoidance behaviors. Our results thus support the notion that anxiety is evolutionarily rooted  
307 in predator defense, as proposed by the “threat imminence” theory of anxiety behaviors<sup>18,19,21</sup>.

308

309         Although AHN consists of predominantly *Vgat*<sup>+</sup> neurons, it is a heterogenous and ill-  
310 demarcated nucleus implicated in multiple behaviors such as thermoregulation, agonist  
311 behaviors, and predator defense<sup>38,39</sup>. Our results now present a new function for AHN<sup>Vgat+</sup>  
312 neurons in mediating anxiety-related behavioral avoidance, but the exact identity of these  
313 neurons among the heterogenous AHN<sup>Vgat+</sup> populations remains to be determined. In particular,  
314 we have defined an anxiogenic function for AHN<sup>Vgat+</sup> neurons downstream of the vSub.  
315 However, some AHN inhibitory neurons receiving inhibitory projections from lateral septum  
316 *Crfr2*-expressing neurons may also inhibit stress-induced anxiety behaviors<sup>12</sup>. Thus, there may  
317 co-exist anxiolytic and anxiogenic AHN<sup>Vgat+</sup> neuronal populations representing subtypes of  
318 AHN neurons that serve opposite functions, analogous to the two subtypes of striatal medium  
319 spiny neurons expressing dopamine receptor 1 or 2<sup>40,11</sup>. In addition, AHN local circuits may  
320 exist to link anxiolytic and anxiogenic neurons for modulating the approach vs. avoidance  
321 behavior in anxiety-provoking situations, similar to the local inhibitory microcircuits found in  
322 the central amygdala (CeA) for fear-related behaviors<sup>41,42</sup>. Thus, detailed characterization of  
323 AHN<sup>Vgat+</sup> neurons in terms of transcriptional heterogeneity, activation patterns, and local- and  
324 long-range connectivity at single-cell resolution is of interest to further dissect the

325 hypothalamic circuits for anxiety-related behaviors.

326

327         Psychologists have long postulated that the hippocampal formation is a center for  
328 computing, comparing, and arbitrating “safety” and “threat” signals to coordinate approach vs.  
329 avoidance in anxiety-provoking situations <sup>2,43,44</sup>. Rodent studies have consistently shown that  
330 the ventral hippocampus, particularly vCA1, regulates anxiety-related behaviors in various  
331 paradigms <sup>9,45–50</sup>. The vCA1 neurons receive inputs from the amygdala <sup>51</sup> and project to  
332 separate several downstream targets, including the medial prefrontal cortex (mPFC), the lateral  
333 hypothalamus (LH), the lateral septum (LS), and BNST, to promote either approach or  
334 avoidance <sup>48,50,52</sup>. Notably, the AHN-projecting vSub neurons we identified are located  
335 posteriorly and anatomically distinct from vCA1 neurons. As the output of the hippocampal  
336 formation, however, these vSub neurons are likely to receive direct inputs from vCA1 <sup>53</sup>.  
337 Notably, we found that AHN-projecting vSub neurons showed progressively increasing activity  
338 on EPM, suggesting cumulation of internal regulatory signals during the behavior test. To our  
339 knowledge, such a progressive activation pattern has never been reported for anxiety-regulating  
340 neurons.

341

342         Our retrograde tracing study showed that  $AHN^{Vgat+}$  neurons receive inputs from mPFC,  
343 LS, LH, vSub, and BNST, all of which are projection targets of vCA1 neurons. Thus,  $AHN^{Vgat+}$   
344 neurons may reside in a network position to integrate threat or safety-related signals transmitted  
345 and processed by these brain regions to initiate behavioral avoidance in anxiogenic situations.  
346 Importantly, we observed that  $AHN^{Vgat+}$  neuron activity tracks closely with avoidance behavior  
347 rather than the type of threats, and its level of increase showed individual specificity across  
348 different test conditions. Thus,  $AHN^{Vgat+}$  neurons may provide an entry point for understanding  
349 how excessive avoidance of perceived harm could emerge in some vulnerable individuals, such

350 as psychiatric patients<sup>54</sup>. In short, our results offer new insights into neural circuit mechanisms  
351 underlying anxiety-related behavioral avoidance.

352

### 353 **Figure Legend**

354 **Fig. 1. Strong temporal correlation of AHN<sup>Vgat+</sup> neuron activity with anxiety-related**  
355 **avoidance behavior in a modified open field paradigm.**

356 **(a)** The open field test modified with the introduction of an unfamiliar object 10 mins after the  
357 initial exploration. “1”, “2” and “3” denote the “center”, “middle” and “peripheral” zone of the  
358 open field. The example trajectory (bottom) and the quantification (right) show that animals  
359 spent more time in the peripheral zone away from the center after object introduction. n = 6  
360 mice. **(b)** Control assays in which animals were allowed to explore the open field continuously  
361 for 20 mins. The example trajectory and the quantification (right) show similar time spent in  
362 all three zones in the first and second 10 mins of the open field test. n = 6 mice. **(c)** Schematic  
363 illustration of the “hypothalamus predator defense circuit”. **(d)** A representative image showing  
364 the fluorescent *in situ* signals of *Vgat* and *Vglut2* mRNA in AHN. Scale bar, 200  $\mu$ m. **(e)** Left,  
365 the strategy to monitor GCaMP6s signals in AHN<sup>Vgat+</sup> neurons. Right, a representative image  
366 showing restricted GCaMP6s expression in AHN. Scale bar, 200  $\mu$ m. **(f)** Average  $\Delta F/F$  values  
367 detected in the “center”, “middle” and “periphery” zone before and after object introduction in  
368 GCaMP6s animals. n = 14 mice. **(g)** A representative trace of  $\Delta F/F$  signals (green, top) aligned  
369 to the relative distance (black, bottom) between a GCaMP6s animal and the object. Red dashed  
370 lines denote onset of approach bouts. **(h-i)** Average  $\Delta F/F$  values of GCaMP6s signal aligned to  
371 approach (h) or retreat onset (i) at the time “0”. Shades indicate the SEM. **(j)** Correlation  
372 between the GCaMP6s  $\Delta F/F$  value at the end of an approach and the latency to initiate the  
373 following approach. n = 351 bouts from 14 mice. **(k)** Correlation between average approach-  
374 end GCaMP6s  $\Delta F/F$  value and the time animals spent in the periphery zone. n = 26 trials from

375 14 mice. \*,  $p < 0.05$ ; \*\*\*,  $p < 0.001$ .

376

377 **Fig. 2. Object-evoked AHN activity shows individual specificity and converges with**  
378 **predator cue response.**

379 (a) Average  $\Delta F/F$  signals  $\pm$  SEM (shades) aligned to approach onset toward different  
380 unfamiliar objects. The colored bars show the average retreat onset  $\pm$  SEM. (b) Correlations  
381 between average approach-end  $\Delta F/F$  value and the time spent in the open field periphery zone  
382 after the introduction of different unfamiliar objects.  $n = 16$  mice. (c) Pair-wise correlations  
383 between the time spent in the periphery zone (left) and the average approach-end  $\Delta F/F$  value  
384 (right) across the four object conditions. The heat map (scale on the right) represents the  
385 correlation co-efficiency ( $r$ ) value with the  $p$  values, indicated by stars, depicted in each cell  
386 for each pair. (d-f) Single unit recordings of AHN neurons. (d) Raster plot (top) and the average  
387 (bottom) of the firing of an example single-unit aligned to the onset of object-approaching  
388 behavior (left) and fox urine sniff (right). (e) Heatmap representation of the normalized single-  
389 unit responses in  $Z$  scores sorted by response magnitude aligned to behavioral onset.  $n = 63$   
390 units from 3 mice. (f) Quantification of the number of single units in each response category.  
391 \*,  $p < 0.05$ ; \*\*,  $p < 0.01$ ; \*\*\*,  $p < 0.001$ .

392

393 **Fig. 3. Optogenetic inhibition of object-evoked AHN<sup>Vgat+</sup> activity reduces avoidance**

394 (a) The viral strategy to optogenetically inhibit AHN<sup>Vgat+</sup> neurons. (b) A representative *post-*  
395 *hoc* image showing GtACR1 expression in AHN and tracks of fibers implanted above. Scale  
396 bar, 200  $\mu\text{m}$ . (c-d) A representative trace (c) and quantifications (d) show light-mediated  
397 inhibition of GtACR1-expressing neurons. (e-j) Optogenetic inhibition of AHN<sup>Vgat+</sup> neurons.  
398 (e) & (h) Light delivery pattern shown by the blue square for experiments in (f-g) & (i-j)  
399 respectively. Red dots denote the starting location of all approach (e) or retreat (h) bouts in a



400 representative trial. The quantification on the right shows the average distance (in the vertical  
401 or horizontal direction) between approach (e) or retreat (h) starting location and the open field  
402 center, where the object was placed. n = 22 mice. (f) & (i) Representative trajectories of an  
403 EYFP or GtACR1 male with light delivered in the center and middle zone (f) or center zone  
404 only (i) after object introduction. (g) & (j) Quantification of the time spent in the indicated zone  
405 before or after object introduction in EYFP (n = 10) and GtACR1 males (n = 12). \*, p < 0.05;  
406 \*\*, p < 0.01; \*\*\*, p < 0.001.

407

408 **Fig. 4. Progressive engagement of  $AHN^{Vgat+}$  neurons on EPM.**

409 **(a-e)** Recording of  $AHN^{Vgat+}$  GCaMP6s signals on EPM. (a) Heatmap representation of EPM  
410  $\Delta F/F$  value in an example trial. (b-c) Average open-arm time (b) and  $\Delta F/F$  values (c) in the first  
411 or second trial. n = 11 mice. (d) Average  $\Delta F/F$  values in the first or second 5 min of the first  
412 trial. n = 12 mice. (e) Correlation between average open arm  $\Delta F/F$  value and the time spent in  
413 the closed arm. n = 14 mice. **(f-h)** GtACR1-mediated optogenetic inhibition of  $AHN^{Vgat+}$   
414 neurons on EPM. (f) Left, schematics showing light delivery restricted to a random open arm;  
415 right, example trajectories from an EYFP or a GtACR1 animal as indicated. (g-h) Time spent  
416 in open arm. n = 7 EYFP and 7 GtACR1 males. \*, p < 0.05; \*\*, p < 0.01.

417

418 **Figure 5. Hippocampal formation sends monosynaptic excitatory inputs to  $AHN^{Vgat+}$**   
419 **neurons**

420 **(a-d)** Retrograde tracing of inputs to  $AHN^{Vgat+}$  neurons. (a) Schematics of the viral strategy.  
421 (b-c) A representative image showing infection of  $AHN^{Vgat+}$  neurons by AAV-DIO-TVA-GFP  
422 and EnVA-pseudotyped rabies virus expressing dsRed (b), and retrograde-labeled dsRed+ cells  
423 in vSub (c). Scale bar, 200  $\mu$ m. (d) Quantification of dsRed+ neurons in candidate excitatory  
424 brain areas as the percentage of total dsRed+ cells detected outside AHN. n = 4 mice. **(e-h)**

425 Validation of vSub inputs to AHN<sup>Vgat+</sup> neurons as monosynaptic and excitatory *via* patch clamp.  
426 (e) Schematics of the viral and electrophysiological recording strategy to probe vSub inputs to  
427 AHN<sup>Vgat+</sup> neurons. (f) The number and percentage of recorded neurons that showed light-  
428 evoked EPSC. n = 35 cells from 6 animals. (g-h) Example traces (g) and quantifications (h) of  
429 light-evoked EPSC amplitude in AHN<sup>Vgat+</sup> neurons under different conditions. Blue bar  
430 indicating light pulse stimulation (10 ms). (i-l) Recording the activity of AHN-projecting vSub  
431 neurons. n = 8. (i) Left, schematics of the viral strategy to target AHN-projecting vSub neurons  
432 retrogradely. Right, representative images showing GCaMP6s expressed in vSub and the track  
433 of the implanted fiber above (top), and retro-Cre expression in AHN (bottom). Scale bar, 200  
434  $\mu$ m. (j) Average of GCaMP6s  $\Delta F/F$  signals  $\pm$  SEM (shades) in AHN-projecting vSub neurons  
435 aligned to approach onset. The bar on top shows average retreat onset  $\pm$  SEM. (k) Heatmap  
436 depiction of EPM GCaMP6s  $\Delta F/F$  signals in an example trial. (l) The average  $\Delta F/F$  values in  
437 the closed arm and open arm in the first and second 5 min of the trial. “#” denotes significant  
438 differences between open arm  $\Delta F/F$  values in the first and second 5 min ( $p < 0.01$ ). \*\*,  $p <$   
439 0.01; \*\*\*,  $p < 0.001$ .

440

441 **Fig. 6. Inhibiting AHN-projecting vSub neurons diminishes anxiety-related avoidance**  
442 **behavior.**

443 (a) Schematics of the strategy to retrogradely target and bilaterally inhibit AHN-projecting  
444 vSub neurons. (b) Representative images showing GtACR1 expression in vSub (top), and  
445 retro-Cre expression in AHN (bottom). Scale bar, 200  $\mu$ m. (c-d) A representative trace (c) and  
446 quantifications (d) showing trains of light pulses (473nm, 20ms, 20Hz), shown as blue lines in  
447 (c), acutely and reversibly inhibit firing of GtACR1-expressing cells. (e-h) GtACR1-mediated  
448 inhibition of AHN-projecting vSub neurons in open field. n = 10 EYFP and 11 GtACR1 males.  
449 (e) Schematics of light delivery restricted to the center and middle zone after object

450 introduction. (f) Example open field trajectories of an EYFP and a GtACR1 male. (g-h) Time  
451 spent in the center, middle and periphery zones before and after object introduction with light  
452 stimulation. (i-k) GtACR1-mediated inhibition of AHN-projecting vSub neurons on EPM. n =  
453 10 EYFP and 9 GtACR1 males. (i) Left, schematics showing light delivery restricted to one  
454 open-arm; right, example trajectories from an EYFP or a GtACR1 animal. (j-k) Time spent in  
455 the light-paired and non-paired open arm. \*,  $p < 0.05$ ; \*\*,  $p < 0.01$ ; \*\*\*,  $p < 0.001$ .

456

### 457 **Extended Data Figure Legend**

458 **Extended Data Fig. 1. Verification of the *Vgat-IRES-Cre* mouse line and fiber photometry**  
459 **recordings in control EYFP male mice.**

460 (a) AAV-EF1 $\alpha$ -DIO-H2B-EGFP was injected into AHN of *Vgat-IRES-Cre* males. A  
461 representative image on the left shows *Vgat in situ* hybridization signals and viral-mediated  
462 GFP expression in AHN. Scale bar, 200  $\mu$ m. The magnified image on the right highlights the  
463 area within the white box. Scale bar, 50  $\mu$ m. Quantification shows the co-localization  
464 of *Vgat* and GFP signals. n = 3 mice. (b-d) Fiber photometry recordings of EYFP mice in open  
465 field with an unfamiliar object. n = 8 mice.

466

467 **Extended Data Fig. 2. Fiber photometry recordings of AHN<sup>Vgat+</sup> activity in response to a**  
468 **familiarized object in an open field and to a female conspecific in the homecage.**

469 (a-d). Fiber photometry recordings of GCaMP6s males with a familiarized object. n = 10 mice.

470 (a) The object (a battery) used was placed in the mouse's homecage for three days before  
471 introduced to the open field. (b) Quantification of the time the mice spent in each zone of the  
472 open field before or after introduction of the familiar object. Mice spent significant time in the  
473 center zone after object introduction. (c-d) Average values of GCaMP6s  $\Delta F/F$  signal aligned to  
474 approach (c) or retreat onset (d) at the time "0". Shades indicate the SEM. No changes in

475 AHN<sup>Vgat+</sup> activity was detected during either behavior. **(e-h)** Fiber photometry recordings of  
476 GCaMP6s males interacting with an unfamiliar, hormonally primed ovariectomized (OVX)  
477 female mouse in the home cage. n = 9 mice. **(e)** Schematics of the behavioral protocol. No  
478 changes in AHN<sup>Vgat+</sup> activity was detected during social investigation **(f)**, sniff **(g)**, or mount  
479 **(h)**. \*\*\*, p < 0.001.

480

481 **Extended Data Fig. 3. Different objects induced similar center avoidance and periphery**  
482 **preference in the open field test.**

483 **(a)** Different unfamiliar objects used. **(b)** The order in which the unfamiliar objects were  
484 presented on separate testing days. **(c)** Time spent in the center, middle, and periphery zone of  
485 the open field before or after the indicated object was introduced. n = 16 mice. \*, p < 0.05; \*\*,  
486 p < 0.01; \*\*\*, p < 0.001.

487

488 **Extended Data Fig. 4. Single-unit recordings of AHN neurons.**

489 **(a)** Schematics showing electrode implantation in AHN and grounding of implanted electrodes.  
490 **(b)** A representative *post-hoc* image showing the tip of the implanted electrode lied within  
491 AHN. Scale bar, 200  $\mu$ m. **(c)** Anatomical tip locations of the implanted electrode in the three  
492 recorded mice. **(d)** Behavioral procedures of single-unit recording experiments.

493

494 **Extended Data Fig. 5. Optogenetic inhibition of AHN<sup>Vgat+</sup> neurons reduces object-induced**  
495 **center avoidance in open field but does not lead to conditioned place preference.**

496 **(a-b)** Time spent in the center zone **(a)** and middle zone **(b)** in open field test before or after an  
497 object introduction. n = 10 EYFP and 12 GtACR1 males. **(c)** Schematics of the real-time place  
498 preference test. The blue region indicates the light-paired chamber and the other unpaired  
499 chamber. **(d)** Time spent in the light-paired chamber before or during light stimulation, 10 min

500 each. n = 5 EYFP and 8 GtACR1. \*, p < 0.05; \*\*, p < 0.01; \*\*\*, p < 0.001.

501

502 **Extended Data Fig. 6. Optogenetic inhibition of AHN<sup>Vgat+</sup> neurons reduces EPM open arm**  
503 **avoidance**

504 (a) Schematics of the light delivery patterns and timing. (b) Example movement trajectories  
505 on EPM from a control EYFP and a GtACR1 male. (c) Time spent in EPM open arm in before,  
506 during, and post-light delivery. Light illumination increased open arm time in GtACR1 but not  
507 control EYFP males. n = 5 EYFP and 11 GtACR1 males. \*, p < 0.05; \*\*\*, p < 0.001.

508

509 **Extended Data Fig. 7. Quantification of and control experiments for pseudorabies**  
510 **mediated retrograde tracing of inputs to AHN<sup>Vgat+</sup> neurons.**

511 (a-b) Pseudotyped rabies virus-mediated retrograde tracing of inputs to AHN<sup>Vgat+</sup> neurons. (a)  
512 Representative images showing dsRed+ neurons in areas indicated. Scale bar, 200  $\mu$ m. (b)  
513 Quantification of dsRed+ neurons in each region as % of total dsRed+ cells detected outside  
514 of the AHN. n = 4 mice. Light blue text indicates areas consisting of predominantly inhibitory  
515 projection neurons ([www.mouse.brain-map.org](http://www.mouse.brain-map.org)). (c-e) The control experiment. n = 3. (c)  
516 Schematics of the viral strategy for the control experiment without RG injection. (d) A  
517 representative image showing infection of AHN<sup>Vgat+</sup> neurons by AAV-DIO-TVA-GFP and  
518 EnVA-pseudotyped rabies virus expressing dsRed. Scale bar, 200  $\mu$ m. (e) Representative  
519 images showing no dsRed+ signal in areas indicated. Scale bar, 200  $\mu$ m. Abbreviations:  
520 cingulate cortex area 1 (Cg1), prelimbic area (PL), infralimbic area (ILA), dorsal peduncular  
521 area (DP), lateral septum (LS), preoptic area (POA), paraventricular hypothalamic nucleus  
522 (PVH), bed nuclei of the stria terminalis (BNST), dorsomedial hypothalamus (DMH),  
523 ventromedial hypothalamus (VMH), arcuate hypothalamic nucleus (ARC), tuberal nucleus  
524 (TU), dorsal preammillary nucleus (PMd), ventral preammillary nucleus (PMv), posterior

525 hypothalamus (PH), ventral subiculum (vSub).

526

## 527 **Methods**

### 528 **Animals**

529 All animals used in the study were adult males aged between 8-30 weeks. Wild-type males of  
530 C57BL/6J background were purchased from Shanghai SLAC Laboratory Animal Co., Ltd or  
531 Beijing Vital River Laboratory Animal Technology Co., Ltd. *Vgat-IRES-Cre*  
532 (*Slc32a1tm2<sup>(cre)Lowl</sup>/J*, Cat# 016962) was purchased from Jackson Laboratory. The animals  
533 were housed with *ad libitum* food and water under a reversed 12:12 hr light-dark cycle in the  
534 animal facility at the Institute of Neuroscience, excepted for those used in single-unit recording  
535 experiments, which were group-housed and bred in the animal facility at the Wuhan National  
536 Laboratory. Each cage contained at most six mice. Experiment protocols were approved by the  
537 Animal Care and Use Committee of the Institute of Neuroscience, Chinese Academy of  
538 Sciences, Shanghai, China (IACUC No. NA-01602016) or by the Hubei Provincial Animal  
539 Care and Use Committee and the Animal Experimentation Ethics Committee of Huazhong  
540 University of Science and Technology (IACUC No.844F).

541

### 542 **Virus**

543 AAV-EF1 $\alpha$ -DIO-mCherry (Serotype 2/8, titer 4.40 x 10<sup>12</sup> vg/mL, vector genome per mL) and  
544 AAV-hSyn-ChR2-mCherry (Serotype 2/8, titer 8.40 x 10<sup>12</sup> vg/mL) were purchased from Obio  
545 Technology Co, Shanghai. AAV-CAG-DIO-GtACR1 (Serotype 2/8, titer 2.20 x 10<sup>12</sup> vg/mL)  
546 was purchased from Taitool Bioscience, Co, Shanghai. AAV- CAG-DIO-GtACR1 (Serotype  
547 2/5, titer 5.00 x 10<sup>12</sup> vg/mL) was purchased from PackGene Biotech Co, Guangzhou. AAV-  
548 EF1 $\alpha$ -DIO-H2B-EGFP (Serotype 2/8, titer 8.33 x 10<sup>12</sup> vg/mL), AAV-EF1 $\alpha$ -DIO-EYFP  
549 (Serotype 2/8, titer 3.58 x 10<sup>12</sup> vg/mL), AAV-hSyn-DIO-GCaMP6s (Serotype 2/8, titer 4.80 x

550  $10^{13}$  vg/mL) and AAV-retro-hSyn-cre-mCherry (Serotype 2/2, titer  $7.00 \times 10^{13}$  vg/mL) were  
551 purchased from gene editing core facility of Institute of Neuroscience. AAV-EF1 $\alpha$ -DIO-RVG  
552 (Serotype 2/9, titer  $2.00 \times 10^{12}$  vg/mL), AAV-EF1 $\alpha$ -DIO-EGFP-2A-TVA (Serotype 2/9, titer  
553  $2.00 \times 10^{12}$  vg/mL) and RV-EnVA-DG-DsRed ( $2.00 \times 10^8$  IFU/mL, infectious units per mL)  
554 were purchased from BrainVTA, Wuhan.

555

### 556 **Mouse surgery**

557 Surgeries were performed as previously described<sup>55</sup>. Stereotaxic surgeries were performed on  
558 a David Kopf Model 1900 frame or a custom-built frame (Cat# SH-01, Xinglin LifeTech) that  
559 allows brain targeting at an angle. The animals were anesthetized with 0.8 - 5% isoflurane or  
560 with intraperitoneal (i.p.) injection of 1% pentobarbital sodium and hypodermic injection of 5  
561 mg/kg carprofen for pain relief. The coordinates used for viral injection were based on the  
562 Paxinos and Franklin Mouse Brain Atlas, 2nd edition. For unilateral targeting of the AHN,  
563 coordinates of AP: - 0.820 mm, ML:  $\pm$  0.500 mm, DV: -5.200 mm were used. For bilateral  
564 targeting of the AHN related to optogenetic inhibition experiments, the coordinates were  
565 adjusted to be AP: - 0.820 mm, ML:  $\pm$  1.400 mm, DV: -5.100 mm at an angle of 10 degrees.  
566 For targeting the vSub, the coordinates were AP: - 4.100 mm, ML:  $\pm$  3.650 mm, DV: -3.800  
567 mm.  $\sim$  60 - 200 nl of the virus was injected into the target brain site with a home-made nano-  
568 liter injector (Cat# SMO-10, Xinglin LifeTech) at a flow rate of  $\sim$  70 nl/min. Optic fibers  
569 (diameter, 200  $\mu$ m; N.A., 0.37; Hangzhou Newdoon Technology Co.,Ltd) were implanted  $\sim$ 50  
570  $\mu$ m above the viral injection site and secured onto the skull for fiber photometry recordings  
571 with dental cement and skull screws. For optogenetic inhibition, optic fiber was implanted 300  
572 - 500  $\mu$ m above the injection site. Animals were allowed to recover at least three weeks before  
573 being tested in behavioral experiments. For pseudorabies tracing experiment,  $\sim$  80 - 150 nl of  
574 the 1:1 mixture of helper virus (AAV-DIO-TVA-GFP and AAV-DIO-RG), or  $\sim$  100 nl AAV-

575 DIO-TVA-GFP alone for control experiments, was first injected unilaterally in the AHN of  
576 *Vgat-IRES-Cre* mice and three weeks later, ~ 100 - 150 nl RV-EnVA-DG-DsRed into the exact  
577 location. Histological analysis was carried out 1 week later. Ovariectomized (OVX) surgeries  
578 were performed with animals anesthetized with i.p. injections of ketamine (80 mg/Kg) and  
579 xylazine (8 mg/Kg), and animals were allowed to recover for over one week after the surgery  
580 prior to subsequent experiments.

581

## 582 **Histology**

583 Histological analysis was performed as previously described<sup>56,57</sup>. Briefly, animals were  
584 anesthetized with 10% chloral hydrate and perfused with PBS, or DEPC treated PBS followed  
585 by 4% PFA. Brains were post-fixed overnight in 4% PFA at 4 °C and sectioned at 40 µm using  
586 a vibratome (VT1000S, Leica) except for experiments involving the RNAscope kit (ACD Bio.).  
587 All virally expressed fluorescent proteins or fusion proteins were visible without immune-  
588 staining. All brain sections were counterstained with DAPI (Sigma, Cat# d9542, 5mg/ml,  
589 1:1,000). Images were captured by a 10 X objective fluorescent microscope (Olympus, VS120)  
590 or confocal microscope (Nikon, C2). For pseudorabies virus tracing, brain sections were evenly  
591 divided into two sets and only one set was mounted, imaged with a 10 X microscope (Olympus,  
592 VS120), and processed in ImageJ software. dsRed<sup>+</sup> cells were counted outside of the AHN  
593 injection site and assigned to specific brain areas according to the Allen Institute adult mouse  
594 coronal atlas (<http://atlas.brain-map.org/>). The percentage inputs (% inputs) was calculated for  
595 each injection site by dividing the number of dsRed<sup>+</sup> cells found in each brain region by the  
596 total number of dsRed<sup>+</sup> cells tallied.

597

598 For histological analysis involving the RNAscope kit, after perfusion and post-fix, brains were  
599 dehydrated with 30% sucrose in DPEC-PBS and sectioned at 20 µm using a microtome and



600 mounted onto SuperFrost Plus® Slides (Fisher Scientific, Cat. No. 12-550-15). RNA probes  
601 for *Vgat* (Cat #319191) and *Vglut2* (Cat #319171-C3) were ordered from ACD Bio. The *in situ*  
602 *hybridization* was performed using the RNAscope kit (ACD Bio.), following the user manual.  
603 Two brain sections covering the AHN were selected from each mouse. Images were captured  
604 with a 20X objective using a confocal microscope (Nikon C2) and processed in ImageJ  
605 software. Based on the DAPI counter-staining signal, the numbers of *Vgat* and *Vglut2* neurons  
606 in the AHN were counted.

607

608 For validating the *Vgat-IRES-Cre* line, we used RNAscope Fluorescent Multiplex Assay  
609 combined with immune-fluorescent staining. One brain section was selected from each mouse.  
610 After the *in situ*, brain slices were blocked by 2.5% BSA (Sigma Cat #V900933) for an hour,  
611 then stained overnight at 4°C with chicken anti-GFP antibody (ABCAM, Cat #ab13970,  
612 dilution 1:300). The next day, the brain sections were rinsed three times with 1 X PBS before  
613 incubating with the secondary antibody, goat-anti-chicken Alexa 488 (Jackson Immuno  
614 Research Laboratories, Cat #103-545-155, dilution 1:300) for two hours. Images were captured  
615 with 60X objective using a confocal microscope (Olympus FV3000) and processed in ImageJ  
616 software. Three 400 x 400-pixel squares were selected from each brain section, analyzed, and  
617 quantified for the proportion of co-labeled neurons.

618

### 619 **Behavioral tests**

620 Mice were singly housed two days before behavioral experiments and were handled once per  
621 day for these two days. Animals were continuously singly housed during the period of  
622 behavioral tests. All behavior tests were recorded with a camera at a frame rate of 25 or 30 Hz.  
623 For behavioral tests in the home cage, a stimulus, an object or a hormonally primed  
624 ovariectomized female, was introduced after the animal was moved to the video-taping area to

625 acclimate for ~ 10 mins. For the open field (OF) test, mice were introduced into a corner of 40  
626 x 40 x 40 cm white box under illumination, ~ 10 min after which, either an object (unfamiliar  
627 or familiar) was introduced into the OF or the experimenter's hand was put briefly about the  
628 box mimicking the motion of object introduction. Afterward, behaviors were recorded for  
629 another 10 min. The unfamiliar object used included type C battery, acrylic cuboid cube, toy  
630 airplane and metal paper clip, presented on separate testing days in a pseudo-randomized  
631 manner. The familiar object used was a type C battery co-housed for three days with the tested  
632 animal. For behavioral analysis, the OF box was divided into three zones. The "center" zone  
633 encompasses the innermost 20 x 20 cm square; the "peripheral" zone is the region within 5 cm  
634 along the wall, and the rest the "middle" zone.

635

636 For single unit recording, a mouse was introduced to an open field arena and allowed to first  
637 explore for ~ 5 min. Afterward, an unfamiliar object was introduced into the center and the  
638 mouse was monitored for another 5 - 10 min. Next, the mouse was introduced to a clean cage  
639 (30 x 20 x 20 cm) and allowed to explore for 5 min. Then a semicircular filter paper (7 cm  
640 diameter) spotted with ~ 400uL red fox urine (Lenonlures company, USA) was introduced to  
641 one side of the cage and the mouse was monitored for another 5 - 10 min. The EPM (Elevated  
642 Plus-Maze) apparatus used consists of a central region (5 x 5 cm), two open-arms (30 x 5 cm),  
643 and two close-arms (30 x 5 x 15 cm), in a "+" configuration and placed 50 cm above the floor.  
644 At the beginning of the EPM test, the mice were put in the center area oriented towards a close-  
645 arm.

646

647 All behavioral videos were annotated with custom-written MATLAB code as previously  
648 described<sup>56</sup>. Approach start was defined as the mice headed to and began to move toward the  
649 object and the end as the mice retreating from the object, which was also the start of the retreat.

650 Retreat end was scored when animals stopped moving. A social investigation was defined as  
651 nose-to-face and nose-to-body contacts initiated by the male towards the female, sniff was  
652 defined as nose-to-urogenital contact, and mount was defined as male placing its forelimbs on  
653 the back of the female and climbing on top. The time that animals spent in each OF zone or  
654 EPM arm were extracted with EthoVision XT (Noldus) or custom-written MATLAB code.  
655 Example trajectories were generated in EthoVision XT (Noldus).

656

### 657 **Fiber photometry**

658 Fiber photometry recordings were carried out as previously described<sup>56</sup>. Before the recording,  
659 the implanted optic fiber was connected to the recording device (Biolink Optics Technology  
660 Inc., Beijing) through an external optic fiber. Briefly, 488 nm laser was reflected through a  
661 dichroic mirror (MD498, Thorlabs), and the fluorescence signal was passed through a bandpass  
662 filter (MF525-39, Thorlabs) and collected in a photomultiplier tube (PMT, R3896, Hamamatsu).  
663 Emission signals were low-pass filtered at 30 Hz and sampled at 500 Hz with a data acquisition  
664 card (USB6009, National Instrument) using software provided by Biolink Optics. A LED bulb  
665 was transiently triggered at the start of the recording session to facilitate alignment of the fiber  
666 photometry recording signal and animal behaviors for data analysis.

667

668 For data analysis, fluorescent signals acquired were analyzed with custom-written MATLAB  
669 code. Briefly, raw signals were first adjusted according to the overall trend to account for  
670 photo-bleaching. Afterward, the values of fluorescence signal change ( $\Delta F/F$ ) were calculated  
671 as  $(F-F_0)/F_0$ . In this formula,  $F$  represents the signal value at any given moment, and  $F_0$   
672 represents the baseline. For recordings done in the open field,  $F_0$  was the average signal value  
673 over the 10 mins after the animals were placed in the open field and before the object  
674 introduction. When tested in the home cage,  $F_0$  was the average fluorescence value over 10

675 mins before introducing stimulus (an object or a female). For the EPM test,  $F_0$  was the mean  
676 fluorescence value for the 10 mins recording period. To calculate the  $\Delta F/F$  value for a defined  
677 open field zone or EPM location, we first extracted the body location of the mice in each frame  
678 to assign the  $\Delta F/F$  value to a specific zone or location and then averaged  $\Delta F/F$  values of all  
679 frames that belonged to a particular zone. To align  $\Delta F/F$  signals with behavior,  $\Delta F/F$  values  
680 were segmented based on behavior events and averaged first across different events in a trial  
681 and then across different trials from each animal.

682

683 To calculate the correlation between the GCaMP6s signal and approach-retreat bout in Figure  
684 1G, we first excluded the behaviors with an inter-behavioral interval of less than one second.  
685 We then transferred the trend-adjusted F value and the behavior data into a binary (0 or 1) form  
686 and calculated the correlation between the two using a nonparametric Spearman correlation  
687 test. For GCaMP6s signal, we defined time points with an F value over two standard deviations  
688 (2 SD) away from the mean as “1” and otherwise as “0”. For approach-retreat behavior, any  
689 time points annotated with the behavior was “1” and otherwise as “0”. For all correlation  
690 analyses involving approach end  $\Delta F/F$  signal (Figure 1J-1N), we excluded recordings of the  
691 first approach from the analysis to rule out any possible effects of initial exposure. We used a  
692 nonparametric Spearman correlation test to calculate the correlation between the approach end  
693  $\Delta F/F$  signal and the approaching interval in Figure 1J, 1M. Other correlation analysis of  $\Delta F/F$   
694 signal and behavioral time were calculated using the parametric Pearson correlation test.  
695 Heatmap representations of  $\Delta F/F$  value on EPM were generated with custom-written  
696 MATLAB code.

697

### 698 **Single-unit recording**

699 Single-unit recording was performed and analyzed as previously<sup>58,59</sup>. Briefly, the guide tubes

700 housed 16-channel electrodes of 25.4-mm formvar-insulated nichrome wire (Cat # 761500, A-  
701 M System, USA). The final impedance of the electrodes was 700–800k $\Omega$ . Mice were implanted  
702 with the 16-channel electrodes targeting AHN and then allowed to recover for at least five days  
703 before further behavioral tests. Before the testing, mice were singly housed and connected to  
704 the recording connector for two days to adapt. During the recording, the 16-channel electrodes  
705 were connected to an amplifier and sampled by a computer. Recorded signals were amplified  
706 (3 200 000 gain) and digitized at 40 kHz by the NeuroPhys Acquisition System (Neurosys  
707 2.8.0.8, USA) and NeuroLego System (Jiangsu Brain Medical Technology Co.ltd). Raw signals  
708 were filtered (300 - 6000 Hz) to remove field potential signals. Single-unit spike sorting was  
709 performed using the MATLAB toolbox (MClust-4.4). Waveforms with amplitudes smaller than  
710 50 - 60  $\mu$ V (three times noise band) were excluded from the analysis. Unsorted waveforms  
711 were analyzed with peak value and two types of principal components. We manually defined  
712 waveforms with similar characters into clusters. A cluster of waveforms was considered a  
713 single neuron if the ratio of its inter-spike-interval (ISI) under 2ms was less than 1%, the  
714 isolation distance was greater than 20, and L-ratio less than 0.1<sup>60,61</sup>. In addition, if the spike  
715 time of any two units coincided via the cross-correlation comparison, those units were also  
716 considered a single unit.

717

718 The neuron firing rate was analyzed by first extracting the spike train frequency during the 5 s  
719 before and after an approach towards an unfamiliar object or a sniffing bout of fox urine. Data  
720 was binned by 250 ms. Object-approach and fox urine-sniff responses were calculated as Z-  
721 scores by normalizing the 20 bins of during-behavior firing rates to the 20 bins of before-  
722 behavior baseline firing rates. Neurons with a Z-score  $>2$  ( $p < 0.05$ ) during any two consecutive  
723 bins within the 2 s after the onset of the behavior were classified as excited neurons, whereas  
724 neurons with a Z-score  $<-2$  ( $p < 0.05$ ) were classified as inhibited neurons.

725 **Optogenetic inhibition**

726 Before the test, the bilateral optic fibers were connected to a 473 nm laser power source  
727 (Shanghai Laser and Optics Century Co. or Changchun New Industries Optoelectronics Tech  
728 Co., Ltd.). Light delivery was controlled by LabState (AniLab), which detects the centroid of  
729 the animal in real-time to trigger the laser or turn it off. In the OF test, the light was triggered  
730 when the centroid of the animal entered the center and middle zone immediately after object  
731 introduction or when the centroid of the animal entered the center zone starting 10 mins after  
732 object introduction, for 10 mins. For the second scenario, animals were monitored for another  
733 10min after cessation of light stimulation as the “post-light” stage. For the EPM test, the light  
734 was triggered when the centroid of the animal entered one randomly selected open-arm  
735 immediately after the animal was placed on the EPM or when the centroid of the animal entered  
736 either of the two open-arms 10 mins after the animal was placed on the EPM, for a duration of  
737 10 mins. For the second scenario, animals were monitored for another 10mins after cessation  
738 of light stimulation as the “post-light” stage. For real-time place preference, the apparatus used  
739 consists of two 17 x 17 cm chambers and a 5-cm-wide gap in between the two chambers. One  
740 chamber was black with a metal-rod floor, and the other chamber was white with a wire floor.  
741 The light was triggered whenever the centroid of an animal entered a randomly chosen light-  
742 paired chamber. Light power in all these experiments was 5 mW, 20 Hz, 20 ms.

743

744 **Brain slice electrophysiological recording**

745 Mice were anesthetized with isoflurane, perfused transcardially with ice-cold oxygenated (95%  
746 O<sub>2</sub>/5% CO<sub>2</sub>) high-sucrose solution (in mM, 2.5 KCl, 1.25 NaH<sub>2</sub>PO<sub>4</sub>, 2 Na<sub>2</sub>HPO<sub>4</sub>, 2 MgSO<sub>4</sub>,  
747 213 sucrose, 26 NaHCO<sub>3</sub>). Brains were sectioned coronally at 250 μm using a vibratome (Leica,  
748 VT1200S) in an ice-cold oxygenated high-sucrose solution. Brain sections containing the  
749 AHN or vSub were incubated in artificial cerebrospinal fluid (in mM, 126 NaCl, 2.5 KCl, 1.25

750 NaH<sub>2</sub>PO<sub>4</sub>, 1.25 Na<sub>2</sub>HPO<sub>4</sub>, 2 MgSO<sub>4</sub>, 10 Glucose, 26 NaHCO<sub>3</sub>, 2 CaCl<sub>2</sub>) at 34 °C for 1 hr. The  
751 intracellular solution for recordings contains (in mM) 135 K-gluconate, 4 KCl, 10 HEPES, 10  
752 sodium phosphocreatine, 4 Mg-ATP, 0.3 Na<sub>3</sub>-GTP and 0.5 biocytin (pH:7.2, 276 mOsm).  
753 Recording electrodes (3-5 MΩ, Borosilicate Glass, Sutter Instrument) were prepared by a  
754 micropipette puller (Sutter Instrument, model P97). For synaptic transmission recordings,  
755 repetitive single pulses of blue light (10 ms, power 12 mW/mm<sup>2</sup>) were delivered onto the brain  
756 slice through a 40×objective with an X-Cite LED light source (Lumen Dynamics). Cells were  
757 clamped at 0 mV for IPSC recording and at -70 mV for EPSC recording. To validate the mono-  
758 synaptic connections between vSub and AHN neurons, 1 μM of tetrodotoxin (TTX, absin, Cat#  
759 abs44200985a) and 1 mM 4-aminopyridine (4-AP, Alomone Labs, Cat# A-115) were  
760 sequentially added into the bath solution. To confirm the effects of neuronal inhibition by  
761 GtACR1, repetitive 20 Hz pulses of blue light ( 20 ms, power 7 mW/mm<sup>2</sup>, interval 20 s) were  
762 delivered onto the AHN or vSub brain slice. Whole-cell recordings were performed using a  
763 MultiClamp700B amplifier and Digi-data 1440A interface (Molecular Devices). Data were  
764 low-pass filtered at 2 kHz and sampled at 20 kHz under voltage clamp, while low-pass filtered  
765 at 10 kHz and sampled at 10 kHz under current clamp. All experiments were performed at 33  
766 °C with a temperature controller (Warner, TC324B).

767

## 768 **Statistical Analysis**

769 Statistical tests were analyzed with GraphPad Prism (GraphPad Software). For comparisons  
770 between two groups, we first analyzed the distribution of the data with the Shapiro-Wilk  
771 normality test. Data sets that passed the normality test were analyzed with Student's t-test (two-  
772 tailed, paired, or unpaired); otherwise, we used the Wilcoxon matched-pairs signed-rank test  
773 for paired data and used non-parametric Mann-Whitney U-test for unpaired data. For  
774 comparisons among data of more than two groups, such as in Fig. 2C, one-way ANOVA was

775 used. All data were plotted as mean  $\pm$  standard error of the mean (SEM). \*,  $p < 0.05$ ; \*\*,  $p <$   
776 0.01; \*\*\*,  $p < 0.001$ .

777

## 778 **Acknowledgements**

779 We thank the Drs. Mu-ming Poo, Xiao-Ke Chen, Ning-Long Xu, Zhe Zhang, Ji Hu for their  
780 valuable comments on the manuscript. This work was supported by grants from the Strategic  
781 Priority Research Program of the Chinese Academy of Sciences (XDB32000000) and the  
782 National Nature Science Foundation of China (31871066, 31922028, 31900721), and by  
783 Shanghai Municipal Science and Technology Major Project (Grant No. 2018SHZDZX05).

784

## 785 **Author Contributions**

786 J.J.Y. & X.H.X. designed the experiments, analyzed the data and wrote the manuscript. A.X.C.  
787 analyzed RV tracing result, prepared the figures and scored behavioral videos. W.Z. performed  
788 electrophysiological recordings. T.H. performed single-unit recordings with the help from M.H.  
789 under the supervision of H.L. X.J.D. performed behavioral tests. Y.Z.X. performed *post-hoc*  
790 immunostaining of brain slices. Y.L. Zhang maintained the mouse colonies.

791

## 792 **Competing Interests**

793 The authors declare no competing interests.

## 794 **Data and material availability**

795 All data and material are available upon publication and personal request.

796

## 797 **References**

798 1. Adolphs, R. & Anderson, D. J. *The Neuroscience of Emotion: A New Synthesis*. (Princeton University  
799 Press, 2018). doi:10.2307/j.ctvc77b1j.



- 800 2. Gray, J. A. & McNaughton, N. *The Neuropsychology of Anxiety: An Enquiry Into the Function of the*  
801 *Septo-hippocampal System*. (OUP Oxford, 2003).
- 802 3. LeDoux, J. *Anxious: Using the Brain to Understand and Treat Fear and Anxiety*. (Penguin, 2016).
- 803 4. Marks, I. fM. & Nesse, R. M. Fear and fitness: An evolutionary analysis of anxiety disorders. *Ethology*  
804 *and Sociobiology* **15**, 247–261 (1994).
- 805 5. Bateson, M., Brilot, B. & Nettle, D. Anxiety: an evolutionary approach. *Can J Psychiatry* **56**, 707–715  
806 (2011).
- 807 6. La-Vu, M., Tobias, B. C., Schuette, P. J. & Adhikari, A. To Approach or Avoid: An Introductory  
808 Overview of the Study of Anxiety Using Rodent Assays. *Front Behav Neurosci* **14**, 145 (2020).
- 809 7. Calhoon, G. G. & Tye, K. M. Resolving the neural circuits of anxiety. *Nat Neurosci* **18**, 1394–1404  
810 (2015).
- 811 8. Tovote, P., Fadok, J. P. & Lüthi, A. Neuronal circuits for fear and anxiety. *Nat Rev Neurosci* **16**, 317–  
812 331 (2015).
- 813 9. Adhikari, A. Distributed circuits underlying anxiety. *Front. Behav. Neurosci.* **8**, (2014).
- 814 10. Perusini, J. N. & Fanselow, M. S. Neurobehavioral perspectives on the distinction between fear and  
815 anxiety. *Learn Mem* **22**, 417–425 (2015).
- 816 11. Kim, S.-Y. *et al.* Diverging neural pathways assemble a behavioural state from separable features in  
817 anxiety. *Nature* **496**, 219–223 (2013).
- 818 12. Anthony, T. E. *et al.* Control of stress-induced persistent anxiety by an extra-amygdala  
819 septohypothalamic circuit. *Cell* **156**, 522–536 (2014).
- 820 13. Jimenez, J. C. *et al.* Anxiety Cells in a Hippocampal-Hypothalamic Circuit. *Neuron* **97**, 670-683.e6  
821 (2018).
- 822 14. Cho, M., Nayak, S. U., Jennings, T., Tallarida, C. S. & Rawls, S. M. Predator odor produces anxiety-  
823 like behavioral phenotype in planarians that is counteracted by fluoxetine. *Physiol Behav* **206**, 181–184  
824 (2019).
- 825 15. Collier, A. D., Kalueff, A. V. & Echevarria, D. J. Zebrafish Models of Anxiety-Like Behaviors. in *The*  
826 *rights and wrongs of zebrafish: Behavioral phenotyping of zebrafish* (ed. Kalueff, A. V.) 45–72  
827 (Springer International Publishing, 2017). doi:10.1007/978-3-319-33774-6\_3.

- 828 16. Adamec, R. E. & Shallow, T. Lasting effects on rodent anxiety of a single exposure to a cat. *Physiol*  
829 *Behav* **54**, 101–109 (1993).
- 830 17. Barros, M. & Tomaz, C. Non-human primate models for investigating fear and anxiety. *Neuroscience*  
831 *& Biobehavioral Reviews* **26**, 187–201 (2002).
- 832 18. Blanchard, D. C., Griebel, G. & Blanchard, R. J. The Mouse Defense Test Battery: pharmacological and  
833 behavioral assays for anxiety and panic. *Eur J Pharmacol* **463**, 97–116 (2003).
- 834 19. Fung, B. J., Qi, S., Hassabis, D., Daw, N. & Mobbs, D. Slow escape decisions are swayed by trait anxiety.  
835 *Nat Hum Behav* **3**, 702–708 (2019).
- 836 20. Hendrie, C. A., Weiss, S. M. & Eilam, D. Exploration and predation models of anxiety: evidence from  
837 laboratory and wild species. *Pharmacol Biochem Behav* **54**, 13–20 (1996).
- 838 21. Mobbs, D. & Kim, J. J. Neuroethological studies of fear, anxiety, and risky decision-making in rodents  
839 and humans. *Curr Opin Behav Sci* **5**, 8–15 (2015).
- 840 22. Sotnikov, S. V., Markt, P. O., Umriukhin, A. E. & Landgraf, R. Genetic predisposition to anxiety-related  
841 behavior predicts predator odor response. *Behav Brain Res* **225**, 230–234 (2011).
- 842 23. Barros, M., Mello, E. L., Huston, J. P. & Tomaz, C. Behavioral effects of buspirone in the marmoset  
843 employing a predator confrontation test of fear and anxiety. *Pharmacol Biochem Behav* **68**, 255–262  
844 (2001).
- 845 24. McGregor, I. S., Hargreaves, G. A., Apfelbach, R. & Hunt, G. E. Neural correlates of cat odor-induced  
846 anxiety in rats: region-specific effects of the benzodiazepine midazolam. *J Neurosci* **24**, 4134–4144  
847 (2004).
- 848 25. Canteras, N. S. The medial hypothalamic defensive system: hodological organization and functional  
849 implications. *Pharmacol Biochem Behav* **71**, 481–491 (2002).
- 850 26. Gross, C. T. & Canteras, N. S. The many paths to fear. *Nat Rev Neurosci* **13**, 651–658 (2012).
- 851 27. Canteras, N. S., Chiavegatto, S., Ribeiro do Valle, L. E. & Swanson, L. W. Severe reduction of rat  
852 defensive behavior to a predator by discrete hypothalamic chemical lesions. *Brain Res Bull* **44**, 297–  
853 305 (1997).
- 854 28. Cezario, A. F., Ribeiro-Barbosa, E. R., Baldo, M. V. C. & Canteras, N. S. Hypothalamic sites responding  
855 to predator threats--the role of the dorsal premammillary nucleus in unconditioned and conditioned

- 856 antipredatory defensive behavior. *Eur J Neurosci* **28**, 1003–1015 (2008).
- 857 29. Papes, F., Logan, D. W. & Stowers, L. The vomeronasal organ mediates interspecies defensive behaviors  
858 through detection of protein pheromone homologs. *Cell* **141**, 692–703 (2010).
- 859 30. Carvalho, V. M. de A. *et al.* Representation of Olfactory Information in Organized Active Neural  
860 Ensembles in the Hypothalamus. *Cell Rep* **32**, 108061 (2020).
- 861 31. Wang, L., Chen, I. Z. & Lin, D. Collateral pathways from the ventromedial hypothalamus mediate  
862 defensive behaviors. *Neuron* **85**, 1344–1358 (2015).
- 863 32. Kunwar, P. S. *et al.* Ventromedial hypothalamic neurons control a defensive emotion state. *Elife* **4**,  
864 (2015).
- 865 33. Pagani, J. H. & Rosen, J. B. The medial hypothalamic defensive circuit and 2,5-dihydro-2,4,5-  
866 trimethylthiazoline (TMT) induced fear: Comparison of electrolytic and neurotoxic lesions. *Brain*  
867 *Research* **1286**, 133–146 (2009).
- 868 34. Carobrez, A. P. & Bertoglio, L. J. Ethological and temporal analyses of anxiety-like behavior: The  
869 elevated plus-maze model 20 years on. *Neuroscience & Biobehavioral Reviews* **29**, 1193–1205 (2005).
- 870 35. Wickersham, I. R., Finke, S., Conzelmann, K.-K. & Callaway, E. M. Retrograde neuronal tracing with  
871 a deletion-mutant rabies virus. *Nat Methods* **4**, 47–49 (2007).
- 872 36. Herman, J. P. & Mueller, N. K. Role of the ventral subiculum in stress integration. *Behavioural Brain*  
873 *Research* **174**, 215–224 (2006).
- 874 37. Tervo, D. G. R. *et al.* A Designer AAV Variant Permits Efficient Retrograde Access to Projection  
875 Neurons. *Neuron* **92**, 372–382 (2016).
- 876 38. Boulant, J. A. Role of the preoptic-anterior hypothalamus in thermoregulation and fever. *Clin Infect Dis*  
877 **31 Suppl 5**, S157-161 (2000).
- 878 39. Xie, Z. *et al.* Mechanically evoked defensive attack is controlled by GABAergic neurons in the anterior  
879 hypothalamic nucleus. *Nat Neurosci* **25**, 72–85 (2022).
- 880 40. Kravitz, A. V., Tye, L. D. & Kreitzer, A. C. Distinct roles for direct and indirect pathway striatal neurons  
881 in reinforcement. *Nat Neurosci* **15**, 816–818 (2012).
- 882 41. Ciocchi, S. *et al.* Encoding of conditioned fear in central amygdala inhibitory circuits. *Nature* **468**, 277–  
883 282 (2010).

- 884 42. Haubensak, W. *et al.* Genetic dissection of an amygdala microcircuit that gates conditioned fear. *Nature*  
885 **468**, 270–276 (2010).
- 886 43. Bach, D. R. *et al.* Human hippocampus arbitrates approach-avoidance conflict. *Curr Biol* **24**, 541–547  
887 (2014).
- 888 44. Bryant, K. G. & Barker, J. M. Arbitration of Approach-Avoidance Conflict by Ventral Hippocampus.  
889 *Front Neurosci* **14**, 615337 (2020).
- 890 45. Bannerman, D. M. *et al.* Ventral hippocampal lesions affect anxiety but not spatial learning. *Behav Brain*  
891 *Res* **139**, 197–213 (2003).
- 892 46. Greenberg, A., Ward-Flanagan, R., Dickson, C. T. & Treit, D. ANI inactivation: unconditioned  
893 anxiolytic effects of anisomycin in the ventral hippocampus. *Hippocampus* **24**, 1308–1316 (2014).
- 894 47. Meyer, H. C. *et al.* Ventral hippocampus interacts with prelimbic cortex during inhibition of threat  
895 response via learned safety in both mice and humans. *Proc Natl Acad Sci U S A* 201910481 (2019)  
896 doi:10.1073/pnas.1910481116.
- 897 48. Padilla-Coreano, N. *et al.* Direct Ventral Hippocampal-Prefrontal Input Is Required for Anxiety-Related  
898 Neural Activity and Behavior. *Neuron* **89**, 857–866 (2016).
- 899 49. Padilla-Coreano, N. *et al.* Hippocampal-Prefrontal Theta Transmission Regulates Avoidance Behavior.  
900 *Neuron* **104**, 601-610.e4 (2019).
- 901 50. Parfitt, G. M. *et al.* Bidirectional Control of Anxiety-Related Behaviors in Mice: Role of Inputs Arising  
902 from the Ventral Hippocampus to the Lateral Septum and Medial Prefrontal Cortex.  
903 *Neuropsychopharmacology* **42**, 1715–1728 (2017).
- 904 51. Felix-Ortiz, A. C. *et al.* BLA to vHPC inputs modulate anxiety-related behaviors. *Neuron* **79**, 658–664  
905 (2013).
- 906 52. Gergues, M. M. *et al.* Circuit and molecular architecture of a ventral hippocampal network. *Nat Neurosci*  
907 **23**, 1444–1452 (2020).
- 908 53. Wee, R. W. S. & MacAskill, A. F. Biased Connectivity of Brain-wide Inputs to Ventral Subiculum  
909 Output Neurons. *Cell Rep* **30**, 3644-3654.e6 (2020).
- 910 54. Grupe, D. W. & Nitschke, J. B. Uncertainty and anticipation in anxiety: an integrated neurobiological  
911 and psychological perspective. *Nat Rev Neurosci* **14**, 488–501 (2013).

- 912 55. Li, X.-Y. *et al.* AGRP Neurons Project to the Medial Preoptic Area and Modulate Maternal Nest-  
913 Building. *J Neurosci* **39**, 456–471 (2019).
- 914 56. Wei, Y.-C. *et al.* Medial preoptic area in mice is capable of mediating sexually dimorphic behaviors  
915 regardless of gender. *Nat Commun* **9**, 279 (2018).
- 916 57. Chen, A.-X. *et al.* Specific Hypothalamic Neurons Required for Sensing Conspecific Male Cues  
917 Relevant to Inter-male Aggression. *Neuron* **108**, 763-774.e6 (2020).
- 918 58. Cui, Y. *et al.* A Central Amygdala-Substantia Innominata Neural Circuitry Encodes Aversive  
919 Reinforcement Signals. *Cell Rep* **21**, 1770–1782 (2017).
- 920 59. Hua, R. *et al.* Calretinin Neurons in the Midline Thalamus Modulate Starvation-Induced Arousal. *Curr*  
921 *Biol* **28**, 3948-3959.e4 (2018).
- 922 60. Lewicki, M. S. A review of methods for spike sorting: the detection and classification of neural action  
923 potentials. *Network* **9**, R53-78 (1998).
- 924 61. Schmitzer-Torbert, N., Jackson, J., Henze, D., Harris, K. & Redish, A. D. Quantitative measures of  
925 cluster quality for use in extracellular recordings. *Neuroscience* **131**, 1–11 (2005).

926

927

928

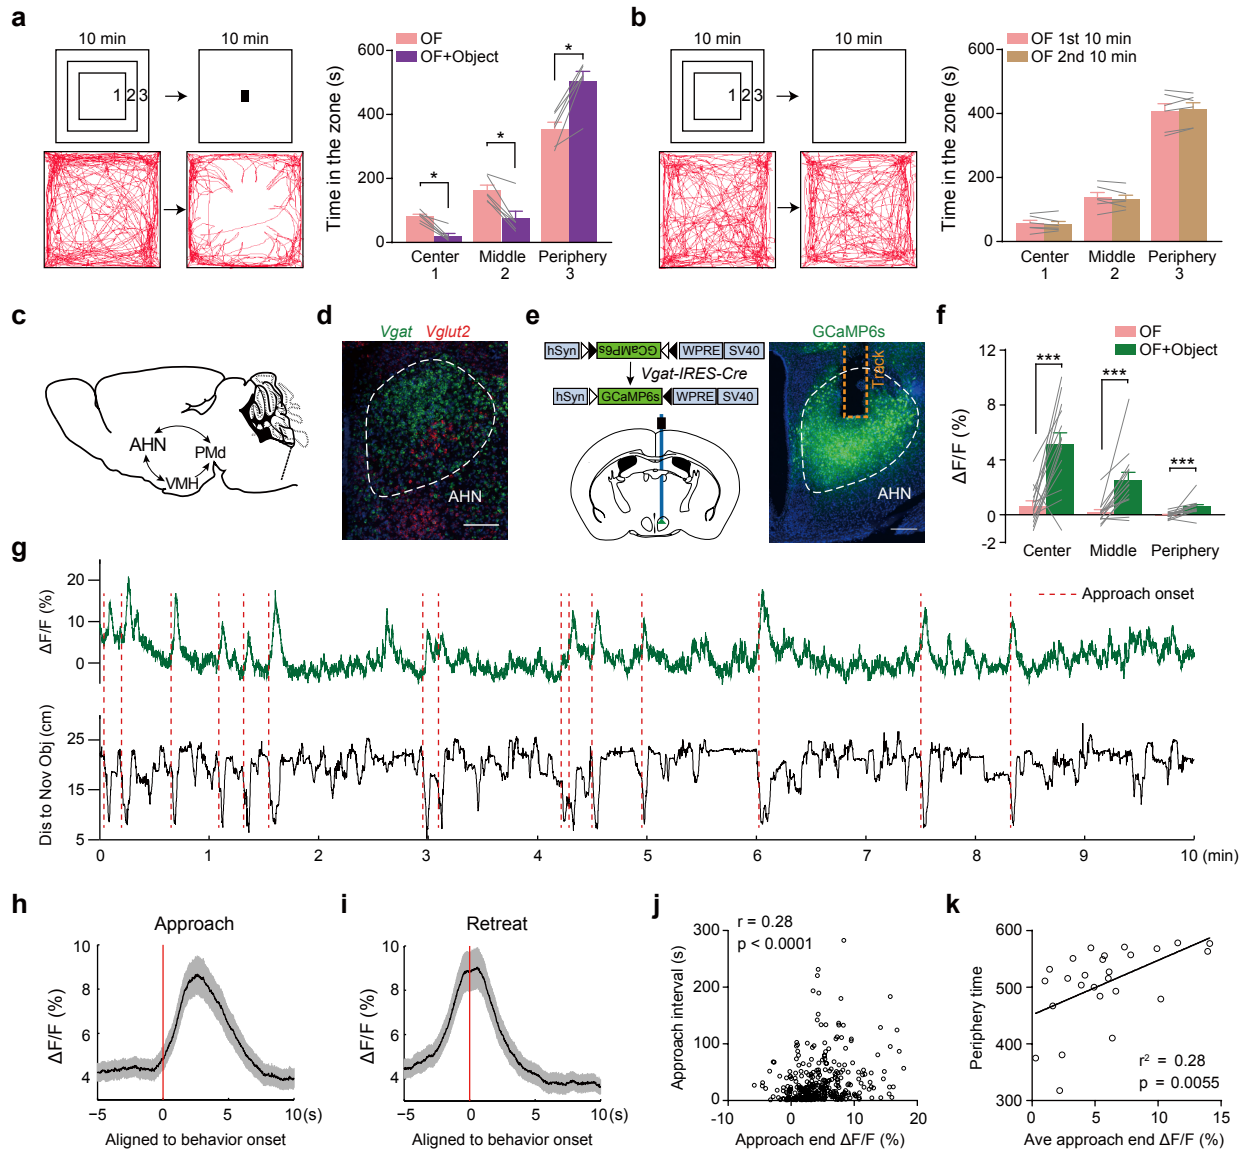

**Fig. 1. Strong temporal correlation of AHN<sup>Vgat+</sup> neuron activity with anxiety-related avoidance behavior in a modified open field paradigm.**

(a) The open field test modified with the introduction of an unfamiliar object 10 mins after the initial exploration. “1”, “2” and “3” denote the “center”, “middle” and “peripheral” zone of the open field. The example trajectory (bottom) and the quantification (right) show that animals spent more time in the peripheral zone away from the center after object introduction.  $n = 6$  mice. (b) Control assays in which animals were allowed to explore the open field continuously for 20 mins. The example trajectory and the quantification (right) show similar time spent in all three zones in the first and second 10 mins of the open field test.  $n = 6$  mice. (c) Schematic illustration of the “hypothalamus predator defense circuit”. (d) A representative image showing the fluorescent in situ signals of *Vgat* and *Vglut2* mRNA in AHN. Scale bar, 200  $\mu\text{m}$ . (e) Left, the strategy to monitor GCaMP6s signals in AHN<sup>Vgat+</sup> neurons. Right, a representative image showing restricted GCaMP6s expression in AHN. Scale bar, 200  $\mu\text{m}$ . (f) Average  $\Delta F/F$  values detected in the “center”, “middle” and “periphery” zone before and after object introduction in GCaMP6s animals.  $n = 14$  mice. (g) A representative trace of  $\Delta F/F$  signals (green, top) aligned to the relative distance (black, bottom) between a GCaMP6s animal and the object. Red dashed lines denote onset of approach bouts. (h-i) Average  $\Delta F/F$  values of GCaMP6s signal aligned to approach (h) or retreat onset (i) at the time “0”. Shades indicate the SEM. (j) Correlation between the GCaMP6s  $\Delta F/F$  value at the end of an approach and the latency to initiate the following approach.  $n = 351$  bouts from 14 mice. (k) Correlation between average approach-end GCaMP6s  $\Delta F/F$  value and the time animals spent in the periphery zone.  $n = 26$  trials from 14 mice. \*,  $p < 0.05$ ; \*\*\*,  $p < 0.001$ .

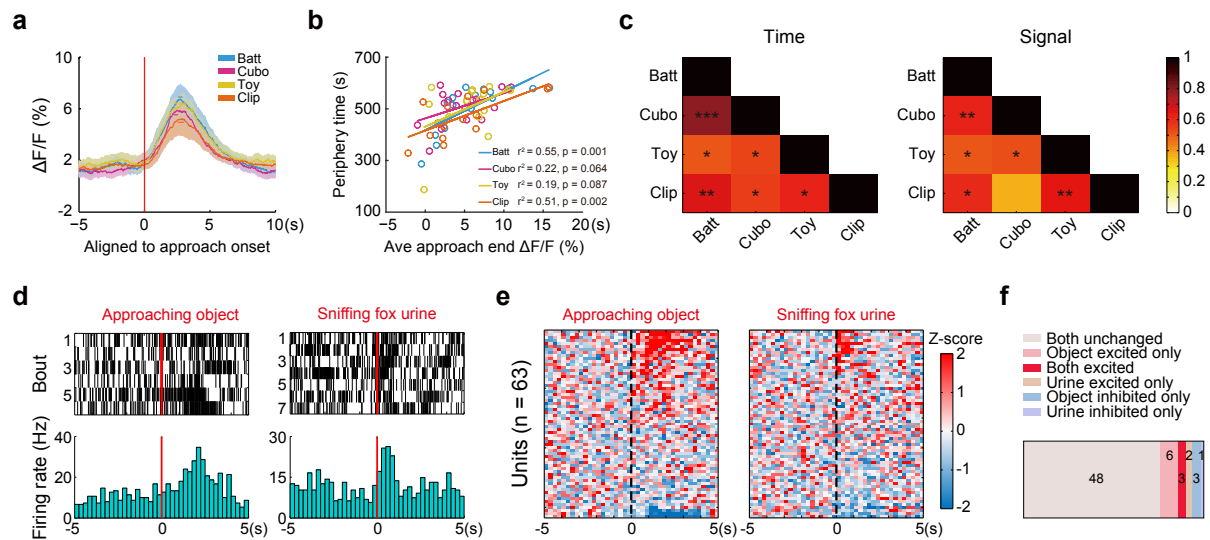

**Fig. 2. Object-evoked AHN activity shows individual specificity and converges with predator cue response.**

(a) Average  $\Delta F/F$  signals  $\pm$  SEM (shades) aligned to approach onset toward different unfamiliar objects. The colored bars show the average retreat onset  $\pm$  SEM. (b) Correlations between average approach-end  $\Delta F/F$  value and the time spent in the open field periphery zone after the introduction of different unfamiliar objects.  $n = 16$  mice. (c) Pair-wise correlations between the time spent in the periphery zone (left) and the average approach-end  $\Delta F/F$  value (right) across the four object conditions. The heat map (scale on the right) represents the correlation co-efficiency ( $r$ ) value with the  $p$  values, indicated by stars, depicted in each cell for each pair. (d-f) Single unit recordings of AHN neurons. (d) Raster plot (top) and the average (bottom) of the firing of an example single-unit aligned to the onset of object-approaching behavior (left) and fox urine sniff (right). (e) Heatmap representation of the normalized single-unit responses in Z scores sorted by response magnitude aligned to behavioral onset.  $n = 63$  units from 3 mice. (f) Quantification of the number of single units in each response category. \*,  $p < 0.05$ ; \*\*,  $p < 0.01$ ; \*\*\*,  $p < 0.001$ .

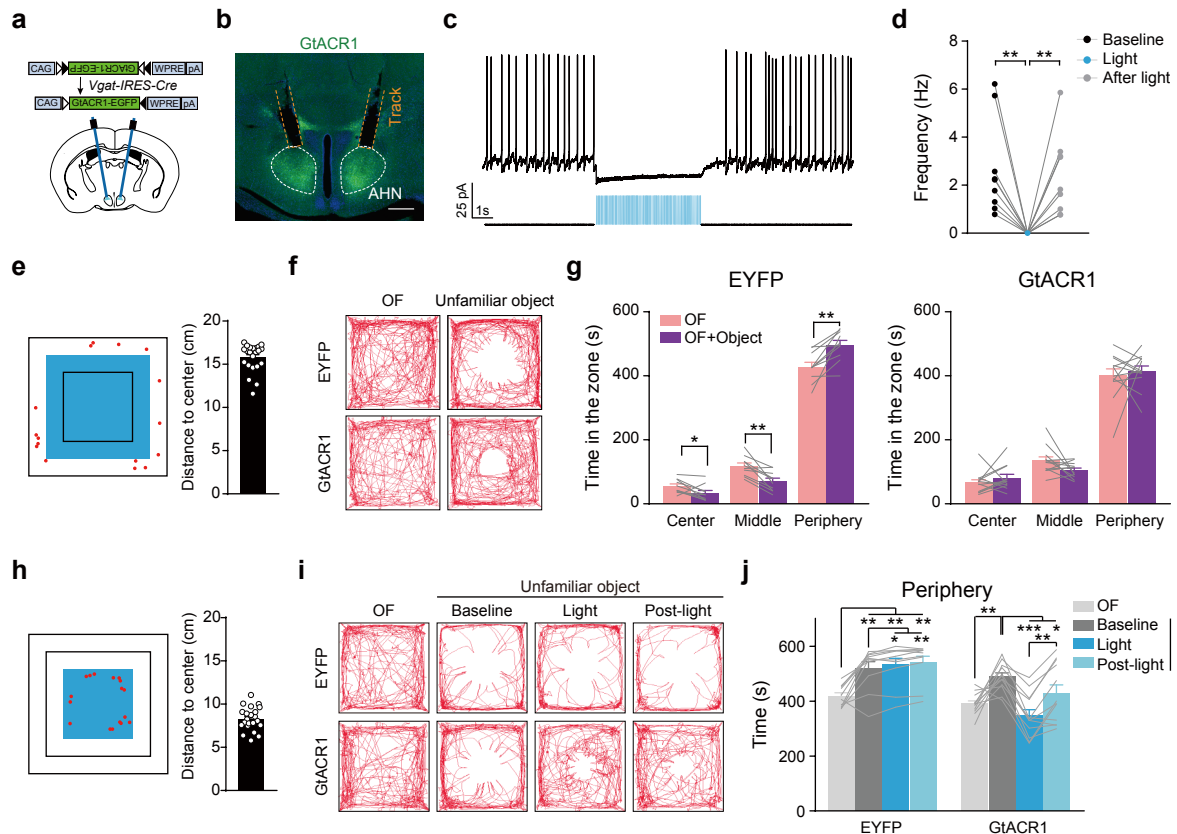

**Fig. 3. Optogenetic inhibition of object-evoked AHN<sup>Vgat+</sup> activity reduces avoidance.**

(a) The viral strategy to optogenetically inhibit AHN<sup>Vgat+</sup> neurons. (b) A representative *post-hoc* image showing GtACR1 expression in AHN and tracks of fibers implanted above. Scale bar, 200  $\mu$ m. (c-d) A representative trace (c) and quantifications (d) show light-mediated inhibition of GtACR1-expressing neurons. (e-j) Optogenetic inhibition of AHN<sup>Vgat+</sup> neurons. (e) & (h) Light delivery pattern shown by the blue square for experiments in (f-g) & (i-j) respectively. Red dots denote the starting location of all approach (e) or retreat (h) bouts in a representative trial. The quantification on the right shows the average distance (in the vertical or horizontal direction) between approach (e) or retreat (h) starting location and the open field center, where the object was placed.  $n = 22$  mice. (f) & (i) Representative trajectories of an EYFP or GtACR1 male with light delivered in the center and middle zone (f) or center zone only (i) after object introduction. (g) & (j) Quantification of the time spent in the indicated zone before or after object introduction in EYFP ( $n = 10$ ) and GtACR1 males ( $n = 12$ ). \*,  $p < 0.05$ ; \*\*,  $p < 0.01$ ; \*\*\*,  $p < 0.001$ .



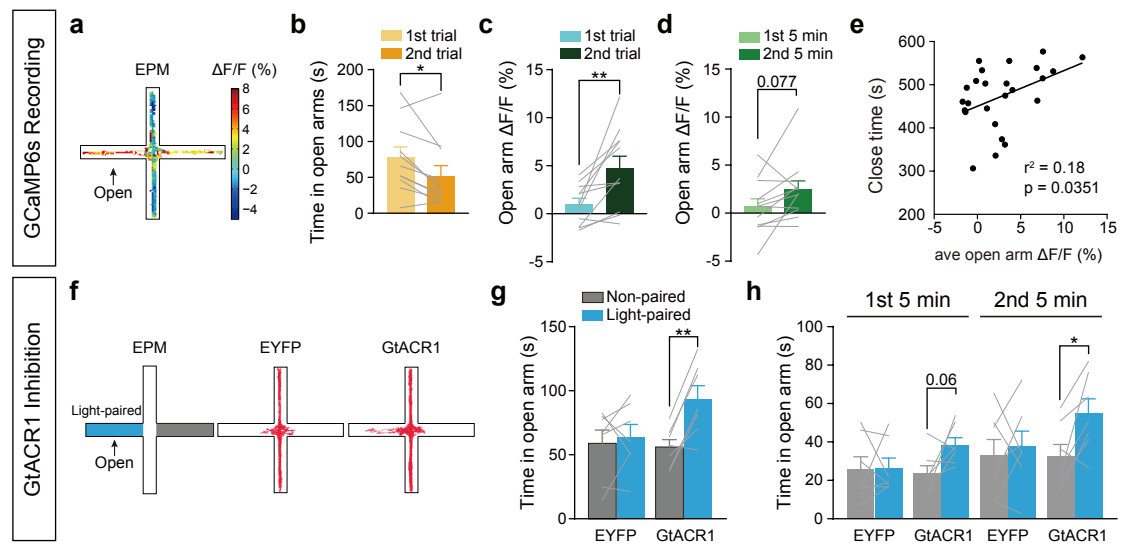

**Fig. 4. Progressive engagement of AHN<sup>Vgat+</sup> neurons on EPM.**

(a-e) Recording of AHN<sup>Vgat+</sup> GCaMP6s signals on EPM. (a) Heatmap representation of EPM  $\Delta F/F$  value in an example trial. (b-c) Average open-arm time (b) and  $\Delta F/F$  values (c) in the first or second trial.  $n = 11$  mice. (d) Average  $\Delta F/F$  values in the first or second 5 min of the first trial.  $n = 12$  mice. (e) Correlation between average open arm  $\Delta F/F$  value and the time spent in the closed arm.  $n = 14$  mice. (f-h) GtACR1-mediated optogenetic inhibition of AHN<sup>Vgat+</sup> neurons on EPM. (f) Left, schematics showing light delivery restricted to a random open arm; right, example trajectories from an EYFP or a GtACR1 animal as indicated. (g-h) Time spent in open arm.  $n = 7$  EYFP and 7 GtACR1 males. \*,  $p < 0.05$ ; \*\*,  $p < 0.01$ .

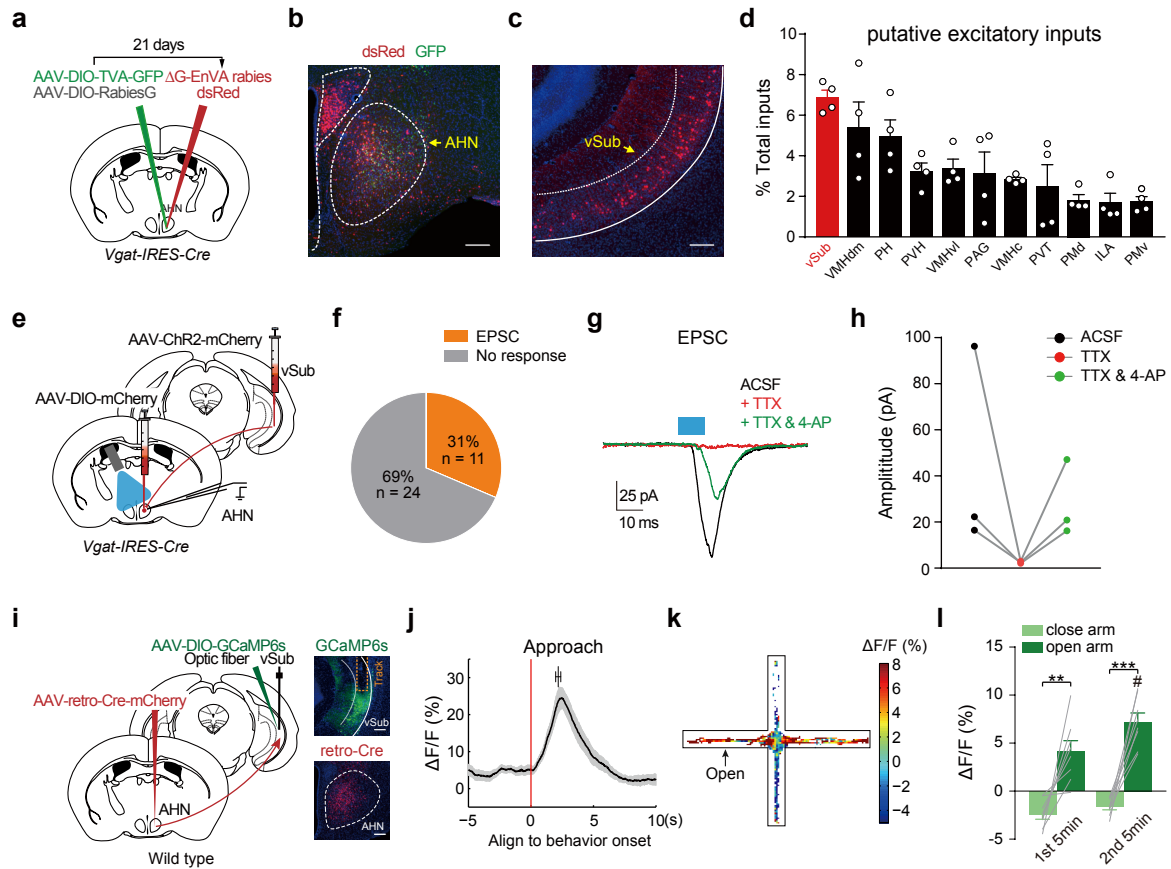

**Figure 5. Hippocampal formation sends monosynaptic excitatory inputs to AHN<sup>Vgat</sup> neurons.**

(a-d) Retrograde tracing of inputs to AHN<sup>Vgat</sup> neurons. (a) Schematics of the viral strategy. (b-c) A representative image showing infection of AHN<sup>Vgat</sup> neurons by AAV-DIO-TVA-GFP and EnVA-pseudotyped rabies virus expressing dsRed (b), and retrograde-labeled dsRed+ cells in vSub (c). Scale bar, 200  $\mu$ m. (d) Quantification of dsRed+ neurons in candidate excitatory brain areas as the percentage of total dsRed+ cells detected outside AHN. n = 4 mice. (e-h) Validation of vSub inputs to AHN<sup>Vgat</sup> neurons as monosynaptic and excitatory via patch clamp. (e) Schematics of the viral and electrophysiological recording strategy to probe vSub inputs to AHN<sup>Vgat</sup> neurons. (f) The number and percentage of recorded neurons that showed light-evoked EPSC. n = 35 cells from 6 animals. (g-h) Example traces (g) and quantifications (h) of light-evoked EPSC amplitude in AHN<sup>Vgat</sup> neurons under different conditions. Blue bar indicating light pulse stimulation (10 ms). (i-l) Recording the activity of AHN-projecting vSub neurons. n = 8. (i) Left, schematics of the viral strategy to target AHN-projecting vSub neurons retrogradely. Right, representative images showing GCaMP6s expressed in vSub and the track of the implanted fiber above (top), and retro-Cre expression in AHN (bottom). Scale bar, 200  $\mu$ m. (j) Average of GCaMP6s  $\Delta$ F/F signals  $\pm$  SEM (shades) in AHN-projecting vSub neurons aligned to approach onset. The bar on top shows average retreat onset  $\pm$  SEM. (k) Heatmap depiction of EPM GCaMP6s  $\Delta$ F/F signals in an example trial. (l) The average  $\Delta$ F/F values in the closed arm and open arm in the first and second 5 min of the trial. “#” denotes significant differences between open arm  $\Delta$ F/F values in the first and second 5 min (p < 0.01). \*\*, p < 0.01; \*\*\*, p < 0.001.

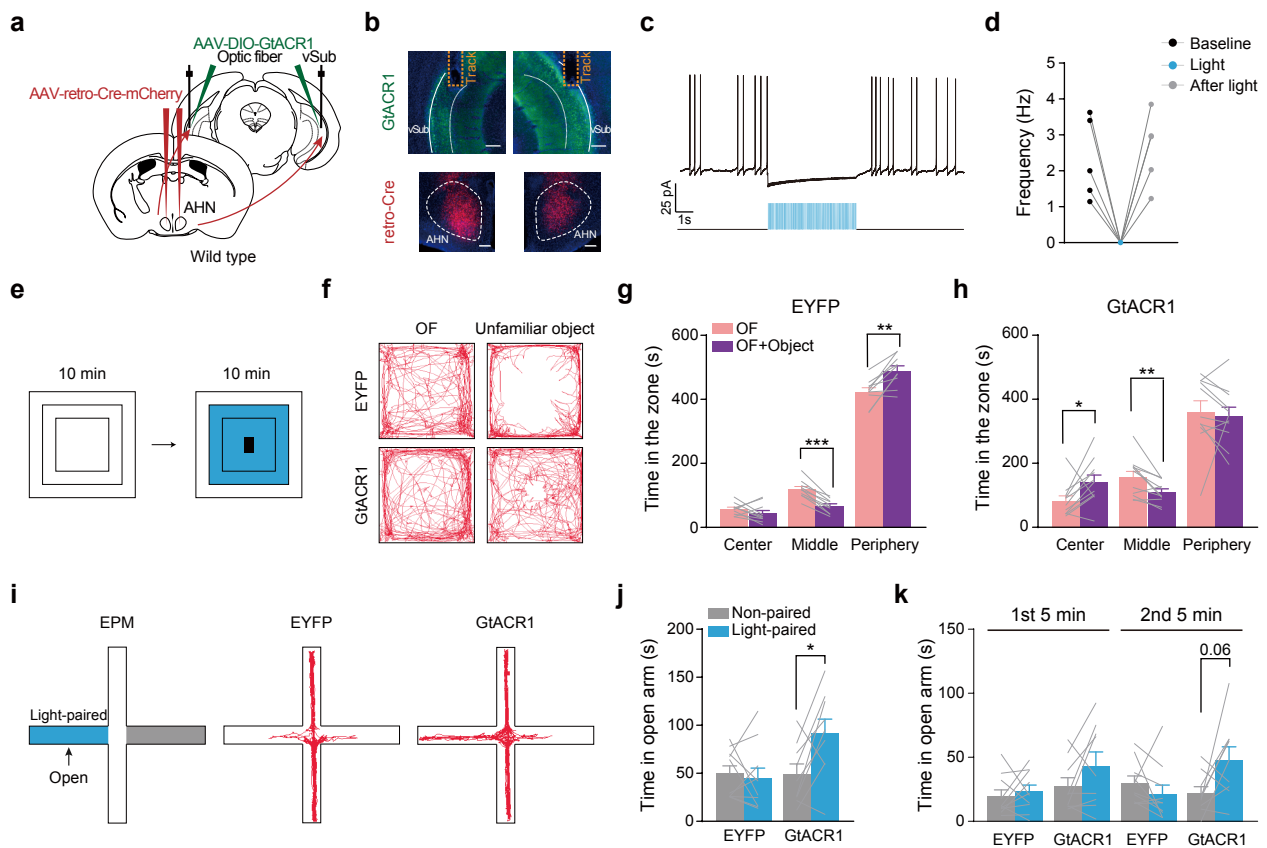

**Fig. 6. Inhibiting AHN-projecting vSub neurons diminishes anxiety-related avoidance behavior.**

(a) Schematics of the strategy to retrogradely target and bilaterally inhibit AHN-projecting vSub neurons. (b) Representative images showing GtACR1 expression in vSub (top), and retro-Cre expression in AHN (bottom). Scale bar, 200  $\mu$ m. (c-d) A representative trace (c) and quantifications (d) showing trains of light pulses (473nm, 20ms, 20Hz), shown as blue lines in (c), acutely and reversibly inhibit firing of GtACR1-expressing cells. (e-h) GtACR1-mediated inhibition of AHN-projecting vSub neurons in open field.  $n = 10$  EYFP and 11 GtACR1 males. (e) Schematics of light delivery restricted to the center and middle zone after object introduction. (f) Example open field trajectories of an EYFP and a GtACR1 male. (g-h) Time spent in the center, middle and periphery zones before and after object introduction with light stimulation. (i-k) GtACR1-mediated inhibition of AHN-projecting vSub neurons on EPM.  $n = 10$  EYFP and 9 GtACR1 males. (i) Left, schematics showing light delivery restricted to one open-arm; right, example trajectories from an EYFP or a GtACR1 animal. (j-k) Time spent in light-paired and non-paired open arm. \*,  $p < 0.05$ ; \*\*,  $p < 0.01$ ; \*\*\*,  $p < 0.001$ .

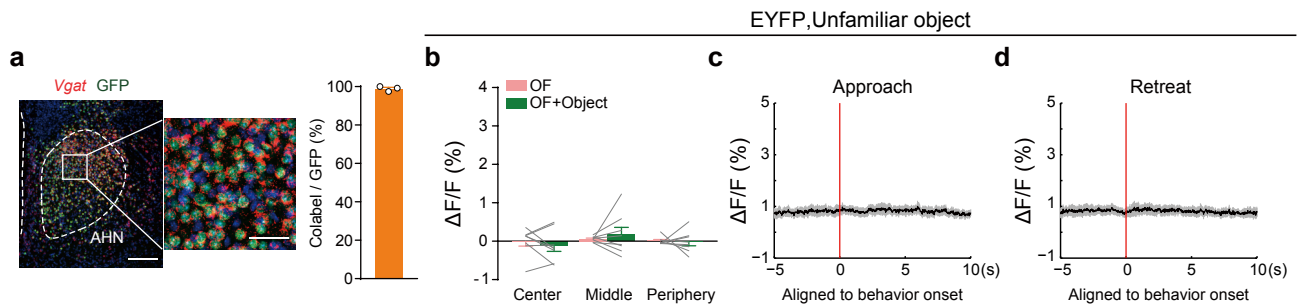

**Extended Data Fig. 1. Verification of the *Vgat-IRES-Cre* mouse line and fiber photometry recordings in control EYFP males mice.**

(a) AAV-EF1 $\alpha$ -DIO-H2B-EGFP was injected into AHN of *Vgat-IRES-Cre* males. A representative image on the left shows *Vgat* in situ hybridization signals and viral-mediated GFP expression in AHN. Scale bar, 200  $\mu$ m. The magnified image on the right highlights the area within the white box. Scale bar, 50  $\mu$ m. Quantification shows the co-localization of *Vgat* and GFP signals.  $n = 3$  mice. (b-d) Fiber photometry recordings of EYFP mice in open field with an unfamiliar object.  $n = 8$  mice.

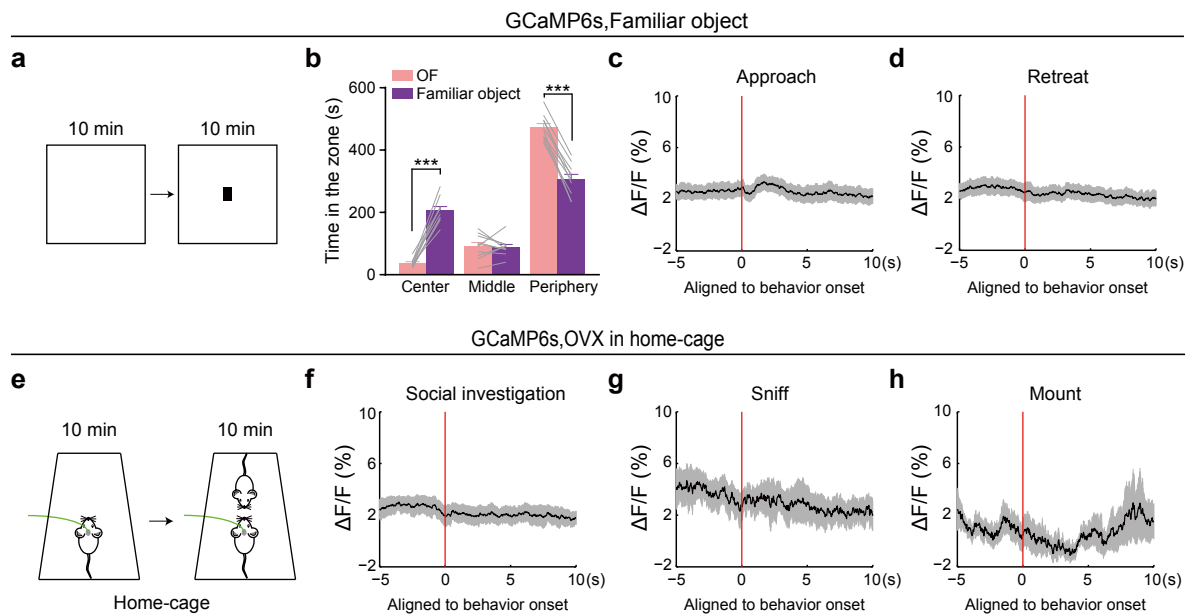

**Extended Data Fig. 2. Fiber photometry recordings of AHN<sup>Vgat+</sup> activity in response to a familiarized object in an open field and to a female conspecific in the homecage.**

**(a-d)** Fiber photometry recordings of GCaMP6s males with a familiarized object. *n* = 10 mice. **(a)** The object (a battery) used was placed in the mouse's homecage for three days before introduced to the open field. **(b)** Quantification of the time the mice spent in each zone of the open field before or after introduction of the familiar object. Mice spent significant time in the center zone after object introduction. **(c-d)** Average values of GCaMP6s  $\Delta F/F$  signal aligned to approach **(c)** or retreat onset **(d)** at the time "0". Shades indicate the SEM. No changes in AHN<sup>Vgat+</sup> activity was detected during either behavior. **(e-h)** Fiber photometry recordings of GCaMP6s males interacting with an unfamiliar, hormonally primed ovariectomized (OVX) female mouse in the home cage. *n* = 9 mice. **(e)** Schematics of the behavioral protocol. No changes in AHN<sup>Vgat+</sup> activity was detected during social investigation **(f)**, sniff **(g)**, or mount **(h)**. \*\*\*, *p* < 0.001.

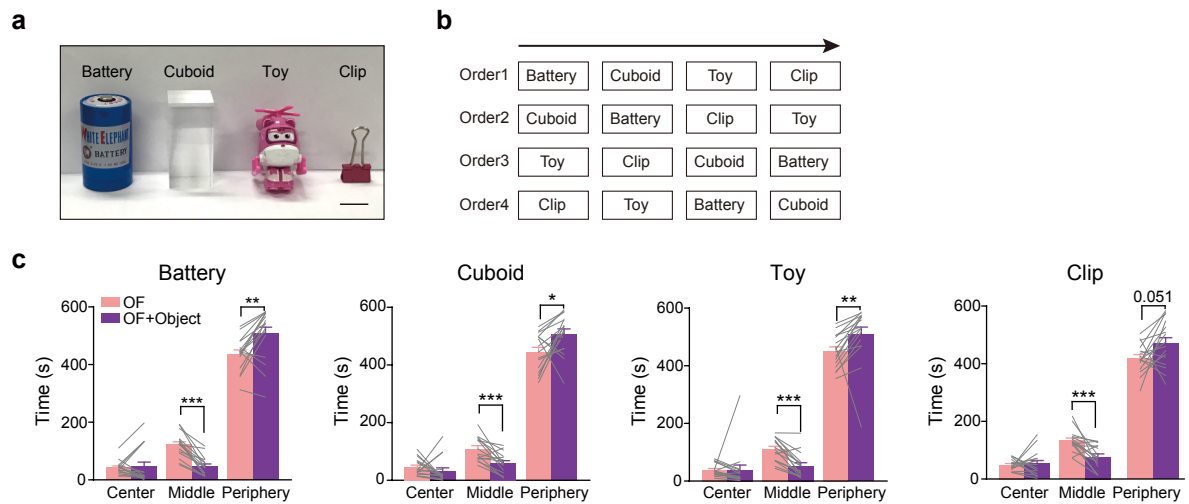

**Extended Data Fig. 3. Different objects induced similar center avoidance and periphery preference in the open field test.**

**(a)** Different unfamiliar objects used. **(b)** The order in which the unfamiliar objects were presented on separate testing days. **(c)** Time spent in the center, middle, and periphery zone of the open field before or after the indicated object was introduced.  $n = 16$  mice. \*,  $p < 0.05$ ; \*\*,  $p < 0.01$ ; \*\*\*,  $p < 0.001$ .

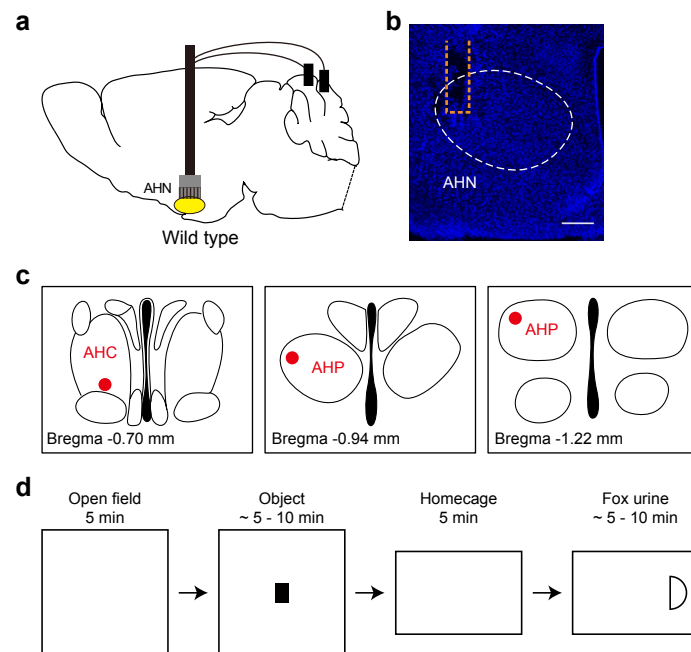

**Extended Data Fig. 4. Single-unit recordings of AHN neurons.**

**(a)** Schematics showing electrode implantation in AHN and grounding of implanted electrodes. **(b)** A representative *post-hoc* image showing the tip of the implanted electrode lied within the AHN. Scale bar, 200  $\mu$ m. **(c)** Anatomical tip locations of the implanted electrode in the three recorded mice. **(d)** Behavioral procedures of single-unit recording experiments.

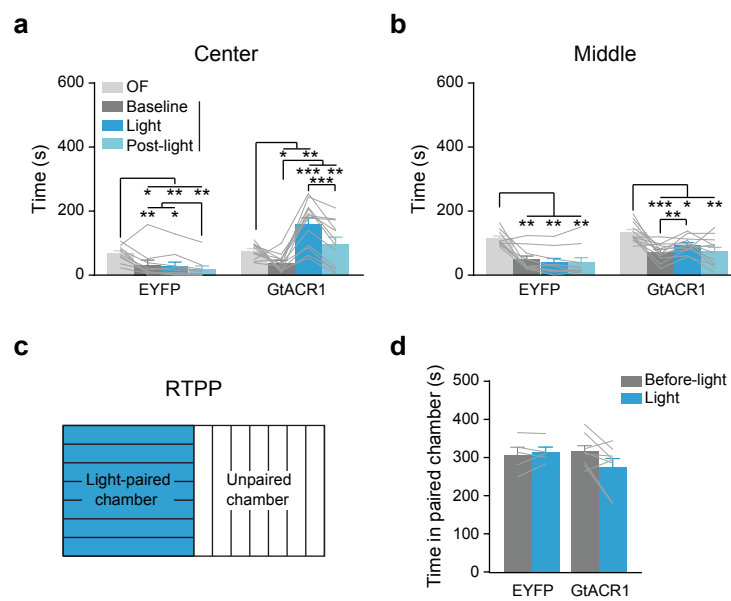

**Extended Data Fig. 5. Optogenetic inhibition of AHN<sup>Vgat+</sup> neurons reduces object-induced center avoidance in open field but does not lead to conditioned place preference.**

(a-b) Time spent in the center zone (a) and middle zone (b) in open field test before or after an object introduction. n = 10 EYFP and 12 GtACR1 males. (c) Schematics of the real-time place preference test. The blue region indicates the light-paired chamber and the other unpaired chamber. (d) Time spent in the light-paired chamber before or during light stimulation, 10 min each. n = 5 EYFP and 8 GtACR1. \*, p < 0.05; \*\*, p < 0.01; \*\*\*, p < 0.001.



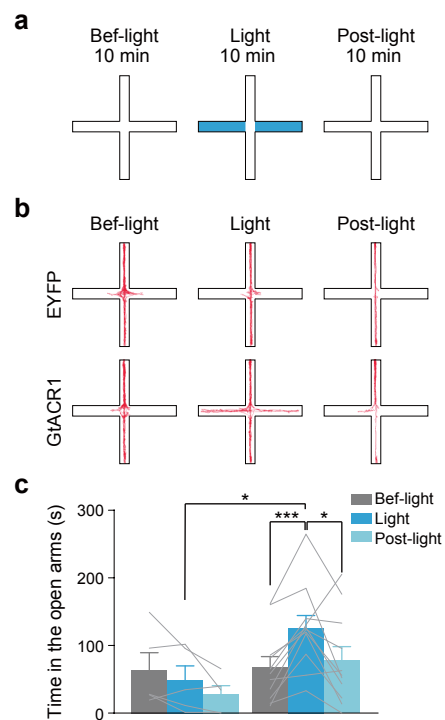

**Extended Data Fig. 6. Optogenetic inhibition of  $AHN^{Vgat+}$  neurons reduces EPM open arm avoidance**

(a) Schematics of the light delivery patterns and timing. (b) Example movement trajectories on EPM from a control EYFP and a GtACR1 male. (c) Time spent in EPM open arm in before, during, and post-light delivery. Light illumination increased open arm time in GtACR1 but not control EYFP males.  $n = 5$  EYFP and 11 GtACR1 males. \*,  $p < 0.05$ ; \*\*\*,  $p < 0.001$ .

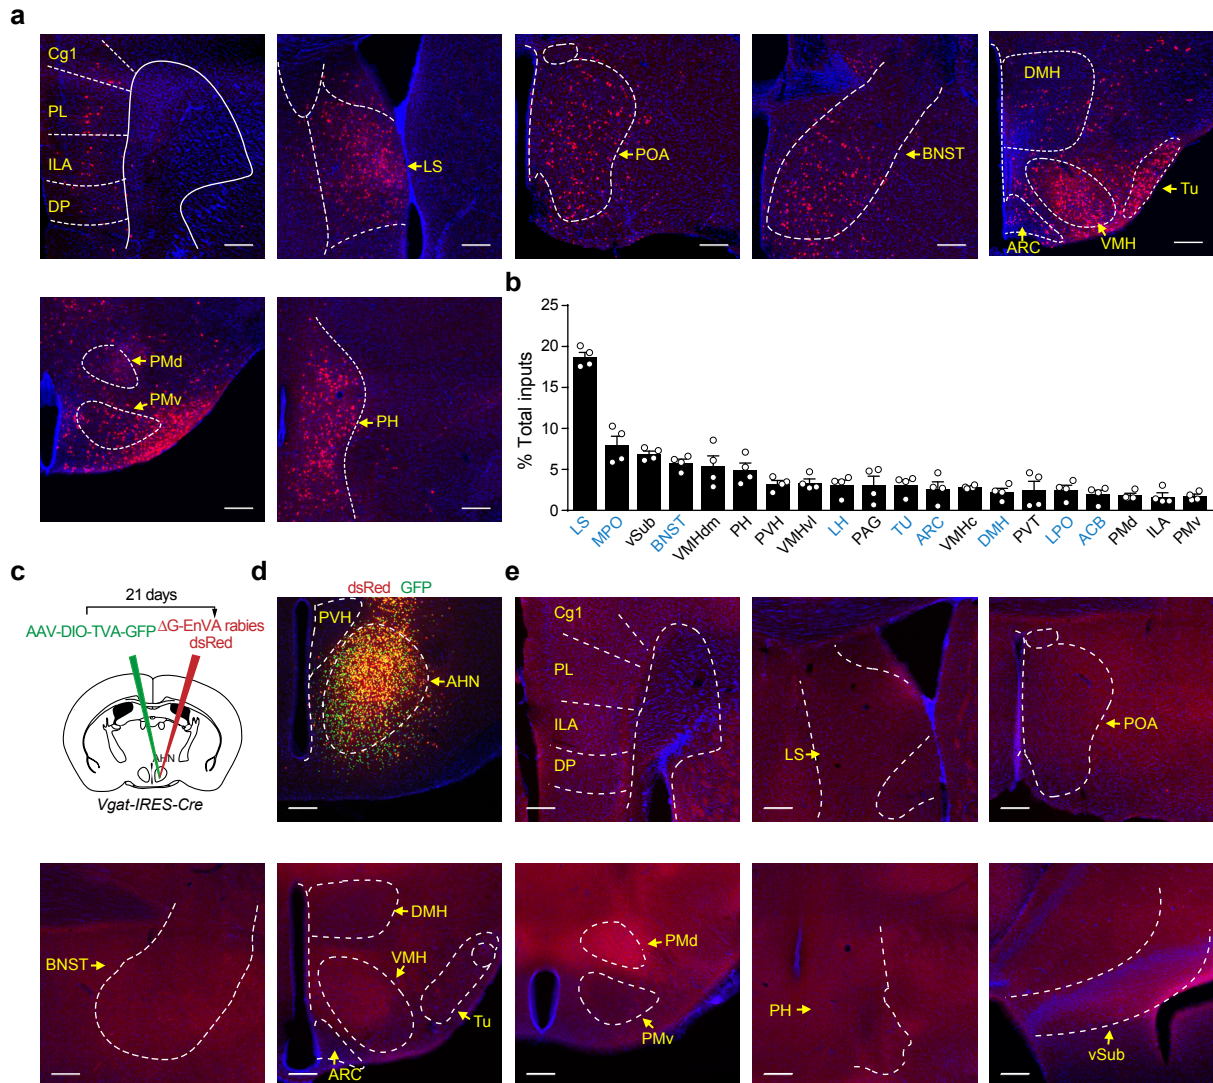

**Extended Data Fig. 7. Quantification of and control experiments for pseudorabies mediated retrograde tracing of inputs to AHN<sup>Vgat+</sup> neurons.**

(a-b) Pseudotyped rabies virus-mediated retrograde tracing of inputs to AHN<sup>Vgat+</sup> neurons. (a) Representative images showing dsRed+ neurons in areas indicated. Scale bar, 200  $\mu$ m. (b) Quantification of dsRed+ neurons in each region as % of total dsRed+ cells detected outside of the AHN.  $n = 4$  mice. Light blue text indicates areas consisting of predominantly inhibitory projection neurons ([www.mouse.brain-map.org](http://www.mouse.brain-map.org)).

(c-e) The control experiment.  $n = 3$ . (c) Schematics of the viral strategy for the control experiment without RG injection. (d) A representative image showing infection of AHN<sup>Vgat+</sup> neurons by AAV-DIO-TVA-GFP and EnVA-pseudotyped rabies virus expressing dsRed. Scale bar, 200  $\mu$ m. (e) Representative images showing no dsRed+ signal in areas indicated. Scale bar, 200  $\mu$ m.

Abbreviations: cingulate cortex area 1 (Cg1), prelimbic area (PL), infralimbic area (ILA), dorsal peduncular area (DP), lateral septum (LS), preoptic area (POA), paraventricular hypothalamic nucleus (PVH), bed nuclei of the stria terminalis (BNST), dorsomedial hypothalamus (DMH), ventromedial hypothalamus (VMH), arcuate hypothalamic nucleus (ARC), tuberal nucleus (TU), dorsal premammillary nucleus (PMd), ventral premammillary nucleus (PMv), posterior hypothalamus (PH), ventral subiculum (vSub).
